# Supplementary material for: Electrochemical tandem cyclization to access sulfonylated fused sultams via SO2 insertion with sodium metabisulfite
Source: Royal Society of Chemistry journal article supplement (doi:10.1039/d2qo01821g), 2022-12-13
Supplement: d2qo01821g1.pdf [file d2qo01821g1.pdf]

# Electrochemical Tandem Cyclization to Access Sulfonylated Fused Sultams *via* SO<sub>2</sub> Insertion with Sodium Metabisulfite

Yun-Hai Sun,<sup>a</sup> Cheng-Jing Li,<sup>a</sup> Ji-Ming Xi,<sup>a</sup> Zhong-Lin Wei,<sup>a</sup> Wei-Wei Liao\*<sup>a,b</sup>

<sup>a</sup> Department of Organic Chemistry, College of Chemistry, Jilin University, 2699 Qianjin Street, Changchun 130012, P R China.

<sup>b</sup> State Key Laboratory of Organometallic Chemistry, Shanghai Institute of Organic Chemistry, Chinese Academy of Sciences, Shanghai 200032, P R China

E-mail: [wliao@jlu.edu.cn](mailto:wliao@jlu.edu.cn)

## Table of Contents

|              |                                                             |              |
|--------------|-------------------------------------------------------------|--------------|
| <b>I.</b>    | <b>General Information.....</b>                             | <b>SI-2</b>  |
| <b>II.</b>   | <b>Reaction Conditions Screening .....</b>                  | <b>SI-3</b>  |
| <b>III.</b>  | <b>Preparation of Substrates.....</b>                       | <b>SI-5</b>  |
| <b>IV.</b>   | <b>General Procedure and Experimental Details.....</b>      | <b>SI-14</b> |
| <b>V.</b>    | <b>Scale-up Reaction and Synthetic Transformations.....</b> | <b>SI-32</b> |
| <b>VI.</b>   | <b>Control Experiments .....</b>                            | <b>SI-35</b> |
| <b>VII.</b>  | <b>Cyclic Voltammetry (CV) Experiments.....</b>             | <b>SI-36</b> |
| <b>VIII.</b> | <b>References.....</b>                                      | <b>SI-36</b> |
| <b>IX.</b>   | <b>Crystal Data and Structure Refinements.....</b>          | <b>SI-37</b> |
| <b>X.</b>    | <b>NMR Spectral Copies</b>                                  |              |

## I. General Information

All reactions were carried out under inert atmospheric condition unless otherwise noted, and solvents were dried according to established procedures. Reactions were monitored by thin layer chromatography (TLC) visualizing with ultraviolet light (UV), and  $\text{KMnO}_4$ ; column chromatography purifications were carried out using silica gel. Proton nuclear magnetic resonance ( $^1\text{H}$  NMR) spectra were recorded on a 300, 400 or 500 MHz spectrometer in  $\text{CDCl}_3$  or DMSO, fluorine nuclear magnetic resonance ( $^{19}\text{F}$  NMR) spectra were recorded on a 376 or 470 MHz spectrometer in  $\text{CDCl}_3$  or DMSO, and carbon nuclear magnetic resonance ( $^{13}\text{C}$  NMR) spectra were recorded on 125 or 100 MHz spectrometer in  $\text{CDCl}_3$  or DMSO unless otherwise noted. Chemical shifts for protons are reported in parts per million downfield from tetramethylsilane (TMS) and are referenced to residual protium in the NMR solvent ( $\text{CHCl}_3 = \delta$  7.26 ppm, DMSO =  $\delta$  2.50 ppm). Chemical shifts for carbon are reported in parts per million downfield from tetramethylsilane (TMS) and are referenced to the carbon resonances of the solvent residual peak ( $\text{CDCl}_3 = \delta$  77.16 ppm, DMSO =  $\delta$  39.52 ppm). NMR data are presented as follows: chemical shift ( $\delta$  ppm), multiplicity (s = singlet, d = doublet, t = triplet, q = quartet, m = multiplet, br = broad), coupling constant in Hertz (Hz), integration. Mass spectra were recorded on the Bruker MicrOTOF Q II. Melting points were measured on a melting point apparatus and were uncorrected. Electrochemical reactions were performed under air using undivided glassware. Electrochemical reactions were conducted using DJS-292 potentiostat in constant potential or current mode. Cyclic voltammetry experiments were carried out in DY2113 potentiostat (Digi Ivy).

## II. Initial Investigation and Optimization of Reaction Conditions

**Table S1. Optimized reaction conditions: effects of additive and solvent.<sup>a</sup>**

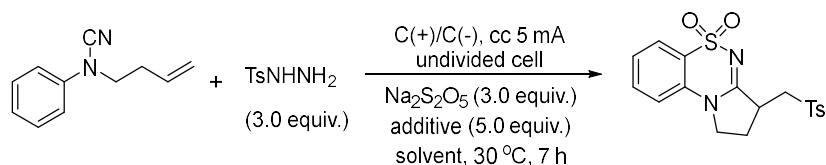

| Entry | Solvent                       | Additive                       | Conv (%) <sup>b</sup> | Yield (%) <sup>b</sup> |
|-------|-------------------------------|--------------------------------|-----------------------|------------------------|
| 1     | MeCN/H <sub>2</sub> O(1/1)    | -                              | 68                    | 17                     |
| 2     | MeCN/H <sub>2</sub> O(1/1)    | K <sub>2</sub> CO <sub>3</sub> | 38                    | 7.2                    |
| 3     | MeCN/H <sub>2</sub> O(1/1)    | NaOAc                          | 31                    | 3.7                    |
| 4     | MeCN/H <sub>2</sub> O(1/1)    | HOAc                           | 38                    | 17                     |
| 5     | MeCN/H <sub>2</sub> O(1/1)    | TFA                            | 61                    | 32                     |
| 6     | MeCN/H <sub>2</sub> O(1/1)    | MsOH                           | 48                    | 40                     |
| 7     | DCM/H <sub>2</sub> O(1/1)     | MsOH                           | 48                    | 8                      |
| 8     | Acetone/H <sub>2</sub> O(1/1) | MsOH                           | 84                    | trace                  |
| 9     | HFIP/H <sub>2</sub> O(1/1)    | MsOH                           | 49                    | 21                     |
| 10    | MeOH/H <sub>2</sub> O(1/1)    | MsOH                           | 45                    | trace                  |
| 11    | MeCN/H <sub>2</sub> O(3/1)    | MsOH                           | 28                    | 24                     |
| 12    | MeCN/H <sub>2</sub> O(1/3)    | MsOH                           | 79                    | 38                     |

<sup>a</sup> Reaction conditions: **1a** (0.3 mmol), **2a** (0.9 mmol), Na<sub>2</sub>S<sub>2</sub>O<sub>5</sub> (3.0 equiv.), additive (5 equiv.) and solvent (*c* = 0.03 *M*) in an undivided cell with graphite rod anode (C-rod, Φ 6 mm), graphite plate cathode (C-plate, 1.5 × 1.5 × 0.2 cm), constant current (*cc* = 5.0 mA), 30°C, 7h, 4.4 F mol<sup>-1</sup>. <sup>b</sup> Determined by <sup>1</sup>H NMR analysis using 1,3,5-trimethoxybenzene as the internal standard.

**Table S2. Optimized reaction conditions: effects of electrolyte, current and temperature<sup>a</sup>**

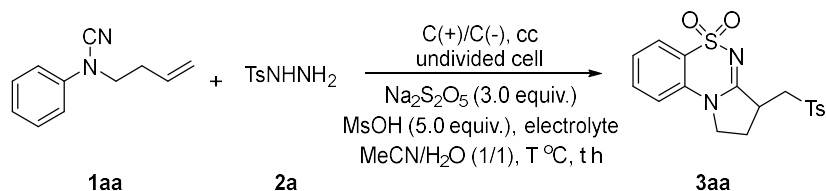

| Entry | Electrolyte                        | <i>I</i> (mA) | <i>t</i> (h) | <i>T</i> (°C) | Conv (%) <sup>b</sup> | Yield (%) <sup>b</sup> | <i>Q</i> (F mol <sup>-1</sup> ) |
|-------|------------------------------------|---------------|--------------|---------------|-----------------------|------------------------|---------------------------------|
| 1     | -                                  | 5             | 7            | 30            | 48                    | 40                     | 4.4                             |
| 2     | Bu <sub>4</sub> NBF <sub>4</sub>   | 5             | 7            | 30            | 50                    | 40                     | 4.4                             |
| 3     | Bu <sub>4</sub> NOAc               | 5             | 7            | 30            | 45                    | 35                     | 4.4                             |
| 4     | CF <sub>3</sub> SO <sub>3</sub> Na | 5             | 7            | 30            | 67                    | 39                     | 4.4                             |
| 5     | -                                  | 5             | 14           | 30            | 77                    | 49                     | 8.8                             |
| 6     | -                                  | 10            | 4            | 30            | 36                    | 21                     | 5.0                             |
| 7     | -                                  | 3             | 13           | 30            | 62                    | 39                     | 4.9                             |
| 8     | -                                  | 5             | 7            | 60            | 92                    | 52                     | 4.4                             |
| 9     | -                                  | 5             | 7            | 80            | 88                    | 21                     | 4.4                             |

<sup>a</sup> Reaction conditions: **1a** (0.3 mmol), **2a** (0.9 mmol), Na<sub>2</sub>S<sub>2</sub>O<sub>5</sub> (3.0 equiv.), MsOH (5 equiv.), electrolyte (0.3mmol) and MeCN/H<sub>2</sub>O (1/1) (*c* = 0.03 *M*) in an undivided cell with graphite rod anode (C-rod, Φ 6 mm), graphite plate cathode (C-plate, 1.5 × 1.5 × 0.2 cm),

constant current (cc = 5.0 mA), 30°C. <sup>b</sup> Determined by <sup>1</sup>H NMR analysis using 1,3,5-trimethoxybenzene as the internal standard. Isolated yield in parenthesis.

**Table S3. Optimized reaction conditions: effect of electrode and cc/cp mode <sup>a</sup>**

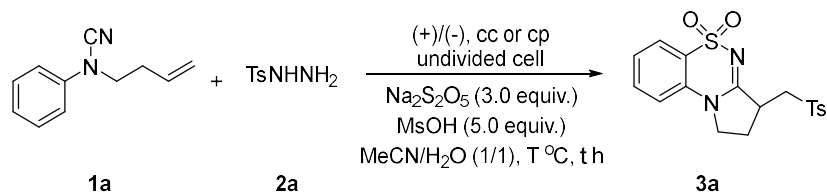

| Entry           | Anodic/Cathode  | cc/cp mode | Conv (%) <sup>b</sup> | Yield (%) <sup>b</sup> |
|-----------------|-----------------|------------|-----------------------|------------------------|
| 1               | C-rod/C-rod     | cc         | 92                    | 52                     |
| 2               | C-rod/Pt        | cc         | 83                    | 41                     |
| 3               | C-rod/Ni        | cc         | 74                    | 27                     |
| 4               | RVC/C-rod       | cc         | 45                    | 17                     |
| 5               | Pt/ C-rod       | cc         | 80                    | Trace                  |
| 6               | C-plate/C-plate | cc         | 63                    | 17                     |
| 7               | C-rod /C-rod    | cp         | 83                    | 52                     |
| 8               | C-rod/C-plate   | cp         | 98                    | 74 (71)                |
| 9               | C-plate/C-rod   | cp         | 92                    | 60                     |
| 10              | C-plate/C-plate | cp         | 98                    | 65                     |
| 11 <sup>c</sup> | C-rod/C-plate   | cp         | 88                    | 58                     |
| 12 <sup>d</sup> | C-rod/C-plate   | cp         | 77                    | 68                     |
| 13 <sup>e</sup> | C-rod/C-plate   | cp         | 91                    | 63                     |
| 14 <sup>f</sup> | C-rod/C-plate   | cp         | 100                   | 71                     |
| 15 <sup>g</sup> | C-rod/C-plate   | cp         | 92                    | 58                     |
| 16 <sup>h</sup> | C-rod/C-plate   | cp         | 88                    | 53                     |
| 17 <sup>i</sup> | C-rod/C-plate   | cp         | 100                   | 68                     |

<sup>a</sup> Reaction conditions: **1a** (0.3 mmol), **2a** (0.9 mmol), Na<sub>2</sub>S<sub>2</sub>O<sub>5</sub> (3.0 equiv.), MsOH (5 equiv.) and MeCN/H<sub>2</sub>O (1/1) (c = 0.03 M) in an undivided cell with electrodes. The cc mode (cc = 5.0 mA): 60°C, 7 h; the cp mode (cp = 1.5 V, *V<sub>cell</sub>*): 30 °C, 12 h. <sup>b</sup> Determined by <sup>1</sup>H NMR analysis using 1,3,5-trimethoxybenzene as the internal standard. <sup>c</sup> Na<sub>2</sub>S<sub>2</sub>O<sub>5</sub> (1.0 eq). <sup>d</sup> Na<sub>2</sub>S<sub>2</sub>O<sub>5</sub> (5.0 eq). <sup>e</sup> MsOH (3.0 eq). <sup>f</sup> 60 °C. <sup>g</sup> K<sub>2</sub>S<sub>2</sub>O<sub>5</sub> (3.0 equiv.). <sup>h</sup> H<sub>2</sub>SO<sub>3</sub> (aq.) (3 equiv.) without MsOH. <sup>i</sup> Under N<sub>2</sub>. Cp = 1.5 V, 12 h, 4.6 F mol<sup>-1</sup>.

cc: constant current; cp: constant potential. C-rod (graphite rod, Φ 6 mm); Pt (10 × 10 × 0.1 cm); Ni (10 × 10 × 0.1 cm); RVC: (100 PPI, 1 × 1 × 1 cm); C-plate (1.5 × 1.5 × 0.2 cm);

### III. Preparation of Substrates

Substrates **1aa -1aq**, **1ba -1ja** and **1la-1na** were prepared according to the known procedure.<sup>1,2</sup> The NMR spectra data of compounds **1aa -1ag**, **1ai -1aq**, **1ba**, **1ga-1ja**, and **1ma** were in accordance with the reported data of the known literatures.<sup>1,2</sup> The NMR spectra data of compounds **1na** were in accordance with the reported data of the known literature.<sup>3</sup> Substrates **1ka** were prepared according to the known procedure.<sup>4</sup> The NMR spectra data of compounds **1ka** were in accordance with the reported data of the known literature.<sup>4</sup>

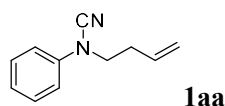

Purified by column chromatography (silica gel, EtOAc/Petroleum ether: 1/12) to afford the title compound (89% yield, 151 mg) as a colorless oil. <sup>1</sup>H NMR (500 MHz, CDCl<sub>3</sub>) δ 7.42 – 7.35 (m, 2H), 7.17 – 7.09 (m, 3H), 5.93 – 5.81 (m, 1H), 5.26 – 5.14 (m, 2H), 3.67 (t, *J* = 7.3 Hz, 2H), 2.59 (q, *J* = 7.0 Hz, 3H). <sup>13</sup>C NMR (100 MHz, CDCl<sub>3</sub>) δ 139.9, 133.1, 129.7, 123.7, 118.6, 116.0, 113.5, 48.9, 31.7.

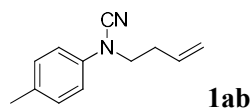

Purified by column chromatography (silica gel, EtOAc/Petroleum ether: 1/15) to afford the title compound (88% yield, 164 mg) as a colorless oil. <sup>1</sup>H NMR (400 MHz, CDCl<sub>3</sub>) δ 7.19 – 7.12 (m, 2H), 7.06 – 6.96 (m, 2H), 5.83 (m, 1H), 5.26 – 5.08 (m, 2H), 3.62 (t, *J* = 7.2 Hz, 2H), 2.60 – 2.49 (m, 2H), 2.32 (s, 3H). <sup>13</sup>C NMR (100 MHz, CDCl<sub>3</sub>) δ 137.4, 133.4, 133.2, 130.2, 118.5, 116.2, 113.9, 49.0, 31.7, 20.6.

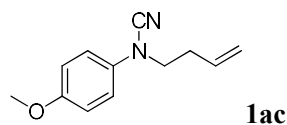

Purified by column chromatography (silica gel, EtOAc/Petroleum ether: 1/12) to afford the title compound (87% yield, 175 mg) as a colorless oil. <sup>1</sup>H NMR (400 MHz, CDCl<sub>3</sub>) δ 7.11 – 7.02 (m, 2H), 6.97 – 6.80 (m, 2H), 5.90 – 5.74 (m, 1H), 5.22 – 5.11 (m, 2H), 3.79 (s, 3H), 3.59 (t, *J* = 7.3 Hz, 2H), 2.53 (q, *J* = 7.0 Hz, 2H). <sup>13</sup>C NMR (100 MHz, CDCl<sub>3</sub>) δ 156.4, 133.21, 133.17, 118.5, 118.4, 114.9, 114.5, 55.6, 49.8, 31.8.

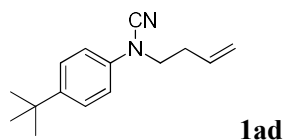

Purified by column chromatography (silica gel, EtOAc/Petroleum ether: 1/20) to afford the title compound (86% yield, 196 mg) as a colorless oil.  $^1\text{H}$  NMR (400 MHz,  $\text{CDCl}_3$ )  $\delta$  7.45 – 7.30 (m, 2H), 7.11 – 7.01 (m, 2H), 5.91 – 5.75 (m, 1H), 5.25 – 5.11 (m, 2H), 3.72 – 3.53 (m, 2H), 2.56 (q,  $J = 7.0$  Hz, 2H), 1.31 (s, 9H).  $^{13}\text{C}$  NMR (100 MHz,  $\text{CDCl}_3$ )  $\delta$  146.7, 137.3, 133.2, 126.5, 118.5, 115.8, 113.8, 49.0, 34.3, 31.7, 31.3.

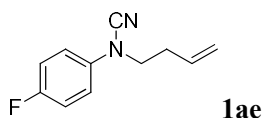

Purified by column chromatography (silica gel, EtOAc/Petroleum ether: 1/12) to afford the title compound (88% yield, 167 mg) as a colorless oil.  $^1\text{H}$  NMR (400 MHz,  $\text{CDCl}_3$ )  $\delta$  7.13 – 7.03 (m, 4H), 5.91 – 5.75 (m, 1H), 5.24 – 5.13 (m, 2H), 3.62 (t,  $J = 7.2$  Hz, 2H), 2.56 (q,  $J = 7.0$  Hz, 2H).  $^{13}\text{C}$  NMR (100 MHz,  $\text{CDCl}_3$ )  $\delta$  159.2 (d,  $J = 243.8$  Hz), 136.1 (d,  $J = 2.4$  Hz), 132.9, 118.7, 118.0 (d,  $J = 8.1$  Hz), 116.5 (d,  $J = 23.1$  Hz), 113.7, 49.2, 31.7.

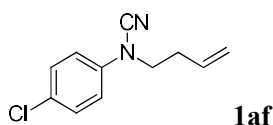

Purified by column chromatography (silica gel, EtOAc/Petroleum ether: 1/12) to afford the title compound (85% yield, 176 mg) as a colorless oil.  $^1\text{H}$  NMR (400 MHz,  $\text{CDCl}_3$ )  $\delta$  7.36 – 7.30 (m, 2H), 7.08 – 7.02 (m, 2H), 5.88 – 5.76 (m, 1H), 5.22 – 5.15 (m, 2H), 3.63 (t,  $J = 7.2$  Hz, 2H), 2.56 (q,  $J = 7.0$  Hz, 2H).  $^{13}\text{C}$  NMR (100 MHz,  $\text{CDCl}_3$ )  $\delta$  138.6, 132.8, 129.7, 129.0, 118.9, 117.3, 113.0, 49.0, 31.6.

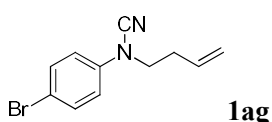

Purified by column chromatography (silica gel, EtOAc/Petroleum ether: 1/12) to afford the title compound (89% yield, 223 mg) as a colorless oil.  $^1\text{H}$  NMR (400 MHz,  $\text{CDCl}_3$ )  $\delta$  7.54 – 7.42 (m, 2H), 7.07 – 6.91 (m, 2H), 5.91 – 5.73 (m, 1H), 5.25 – 5.09 (m, 2H), 3.63 (t,  $J = 7.2$  Hz, 2H), 2.56 (q,  $J = 7.0$  Hz, 2H).  $^{13}\text{C}$  NMR (100 MHz,  $\text{CDCl}_3$ )  $\delta$  139.1, 132.8, 132.7, 118.9, 117.7, 116.4, 112.9, 49.0, 31.6.

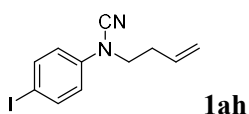

Purified by column chromatography (silica gel, EtOAc/Petroleum ether: 1/10) to afford the title compound (77% yield, 229 mg) as a yellow oil.  $^1\text{H}$  NMR (400 MHz,  $\text{CDCl}_3$ )  $\delta$  7.66 (d,  $J = 8.9$  Hz, 2H), 6.89 (d,  $J = 8.9$  Hz, 2H), 5.91 – 5.72 (m, 1H), 5.27 – 5.08 (m, 2H), 3.63 (t,  $J = 7.2$  Hz, 2H), 2.65 – 2.47 (m, 2H).  $^{13}\text{C}$  NMR (125 MHz,  $\text{CDCl}_3$ )  $\delta$  139.8, 138.5, 132.8, 118.9, 117.9, 112.8, 86.6, 48.8, 31.5. HRMS (ESI)  $m/z$ :  $[\text{M} + \text{H}]^+$  Calcd for  $\text{C}_{11}\text{H}_{12}\text{N}_2$  299.0040; Found 299.0036.

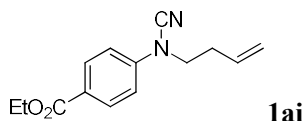

Purified by column chromatography (silica gel, EtOAc/Petroleum ether: 1/5) to afford the title compound (75% yield, 183 mg) as a colorless oil.  $^1\text{H}$  NMR (500 MHz,  $\text{CDCl}_3$ )  $\delta$  8.06 (d,  $J = 8.9$  Hz, 2H), 7.15 (d,  $J = 8.9$  Hz, 1H), 5.84 (ddt,  $J = 17.1, 10.3, 6.8$  Hz, 1H), 5.25 – 5.15 (m, 2H), 4.37 (q,  $J = 7.1$  Hz, 2H), 3.72 (t,  $J = 7.2$  Hz, 2H), 2.60 (q,  $J = 7.0$  Hz, 1H), 1.39 (t,  $J = 7.1$  Hz, 3H).  $^{13}\text{C}$  NMR (125 MHz,  $\text{CDCl}_3$ )  $\delta$  165.8, 143.7, 132.7, 131.4, 125.7, 119.0, 115.1, 112.4, 61.0, 48.7, 31.6, 14.4.

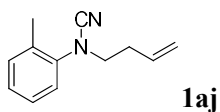

Purified by column chromatography (silica gel, EtOAc/Petroleum ether: 1/12) to afford the title compound (90% yield, 168 mg) as a colorless oil.  $^1\text{H}$  NMR (400 MHz,  $\text{CDCl}_3$ )  $\delta$  7.26 – 7.16 (m, 4H), 5.88 – 5.70 (m, 1H), 5.24 – 5.10 (m, 2H), 3.49 (t,  $J = 7.3$  Hz, 2H), 2.56 – 2.44 (m, 2H), 2.39 (s, 3H).  $^{13}\text{C}$  NMR (100 MHz,  $\text{CDCl}_3$ )  $\delta$  139.1, 134.0, 133.5, 131.8, 127.7, 127.2, 124.7, 118.3, 115.5, 53.1, 32.1, 17.9.

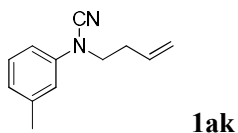

Purified by column chromatography (silica gel, EtOAc/Petroleum ether: 1/12) to afford the title compound (90% yield, 168 mg) as a colorless oil.  $^1\text{H}$  NMR (400 MHz,  $\text{CDCl}_3$ )  $\delta$  7.25 (t,  $J = 7.9$  Hz, 1H), 6.98 – 6.86 (m, 3H), 5.90 – 5.78 (m, 1H), 5.23 – 5.13 (m, 2H), 3.64 (t,  $J = 7.0$  Hz, 2H), 2.62 – 2.52 (m, 2H), 2.36 (s, 3H).  $^{13}\text{C}$  NMR (100 MHz,  $\text{CDCl}_3$ )  $\delta$  139.9, 139.8, 133.1, 129.5, 124.5, 118.5, 116.8, 113.7, 113.0, 48.8, 31.7, 21.6.

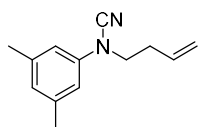

**1al**

Purified by column chromatography (silica gel, EtOAc/Petroleum ether: 1/10) to afford the title compound (83% yield, 166 mg) as a colorless oil.  $^1\text{H}$  NMR (500 MHz,  $\text{CDCl}_3$ )  $\delta$  6.76 (s, 3H), 6.01 – 5.70 (m, 1H), 5.36 – 5.05 (m, 2H), 3.64 (t,  $J = 7.3$  Hz, 2H), 2.76 – 2.52 (m, 2H), 2.34 (s, 6H).  $^{13}\text{C}$  NMR (125 MHz,  $\text{CDCl}_3$ )  $\delta$  139.8, 139.6, 133.2, 125.5, 118.5, 113.9, 48.8, 31.7, 21.5. HRMS (ESI)  $m/z$ :  $[\text{M} + \text{H}]^+$  Calcd for  $\text{C}_{13}\text{H}_{17}\text{N}_2$  201.1386; Found 201.1387.

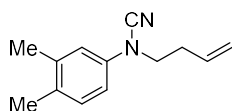

**1am**

Purified by column chromatography (silica gel, EtOAc/Petroleum ether: 1/10) to afford the title compound (83% yield, 166 mg) as a colorless oil.  $^1\text{H}$  NMR (400 MHz,  $\text{CDCl}_3$ )  $\delta$  7.11 (d,  $J = 8.2$  Hz, 1H), 6.93 (d,  $J = 2.8$  Hz, 1H), 6.82 (dd,  $J = 8.2, 2.8$  Hz, 1H), 6.12 – 5.69 (m, 1H), 5.23 – 5.11 (m, 2H), 3.61 (t,  $J = 7.3$  Hz, 2H), 2.60 – 2.48 (m, 2H), 2.26 (s, 3H), 2.22 (s, 3H).  $^{13}\text{C}$  NMR (100 MHz,  $\text{CDCl}_3$ )  $\delta$  138.2, 137.6, 133.2, 132.1, 130.6, 118.4, 117.7, 114.1, 113.4, 49.0, 31.7, 20.0, 19.0.

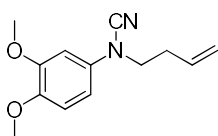

**1an**

Purified by column chromatography (silica gel, EtOAc/Petroleum ether: 1/8) to afford the title compound (84% yield, 195 mg) as a colorless oil.  $^1\text{H}$  NMR (400 MHz,  $\text{CDCl}_3$ )  $\delta$  6.84 (d,  $J = 8.7$  Hz, 1H), 6.73 (d,  $J = 2.8$  Hz, 1H), 6.60 (dd,  $J = 8.7, 2.8$  Hz, 1H), 5.92 – 5.74 (m, 1H), 5.27 – 5.11 (m, 2H), 3.89 (s, 3H), 3.87 (s, 3H), 3.60 (t,  $J = 7.2$  Hz, 2H), 2.65 – 2.50 (m, 2H).  $^{13}\text{C}$  NMR (125 MHz,  $\text{CDCl}_3$ )  $\delta$  149.9, 145.9, 133.6, 133.2, 118.5, 114.3, 111.9, 108.2, 102.1, 56.3, 56.1, 49.7, 31.8.

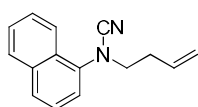

**1ao**



Purified by column chromatography (silica gel, EtOAc/Petroleum ether: 1/12) to afford the title compound (81% yield, 180 mg) as a colorless oil.  $^1\text{H}$  NMR (400 MHz,  $\text{CDCl}_3$ )  $\delta$  7.88 – 7.70 (m, 3H), 7.54 – 7.34 (m, 4H), 5.96 – 5.80 (m, 1H), 5.25 – 5.15 (m, 2H), 3.81 – 3.71 (m, 2H), 2.63 (q,  $J = 7.0$  Hz, 2H).  $^{13}\text{C}$  NMR (100 MHz,  $\text{CDCl}_3$ )  $\delta$  137.4, 133.8, 133.1, 130.1, 130.0, 127.8, 127.24, 127.15, 125.3, 118.7, 116.5, 113.7, 112.2, 49.1, 31.7.

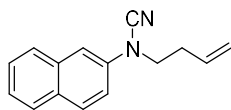

**1ap**

Purified by column chromatography (silica gel, EtOAc/Petroleum ether: 1/8) to afford the title compound (84% yield, 189 mg) as a colorless oil.  $^1\text{H}$  NMR (400 MHz,  $\text{CDCl}_3$ )  $\delta$  7.85 (dd,  $J = 8.9, 2.4$  Hz, 1H), 7.80 (d,  $J = 8.1$  Hz, 1H), 7.76 (d,  $J = 8.2$  Hz, 1H), 7.54 – 7.45 (m, 1H), 7.47 – 7.34 (m, 3H), 5.96 – 5.78 (m, 1H), 5.27 – 5.13 (m, 2H), 3.85 – 3.71 (m, 2H), 2.68 – 2.58 (m, 2H).  $^{13}\text{C}$  NMR (100 MHz,  $\text{CDCl}_3$ )  $\delta$  137.5, 133.9, 133.2, 130.2, 130.1, 127.9, 127.4, 127.3, 125.4, 118.8, 116.6, 113.8, 112.3, 49.2, 31.8.

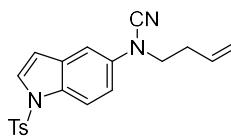

**1aq**

Purified by column chromatography (silica gel, EtOAc/Petroleum ether: 1/8) to afford the title compound (75% yield, 274 mg) as a yellow oil.  $^1\text{H}$  NMR (500 MHz,  $\text{CDCl}_3$ )  $\delta$  7.96 (d,  $J = 9.0$  Hz, 1H), 7.74 (d,  $J = 8.4$  Hz, 2H), 7.58 (d,  $J = 3.6$  Hz, 1H), 7.25 – 7.21 (m, 3H), 7.13 (dd,  $J = 9.0, 2.4$  Hz, 1H), 6.61 (d,  $J = 3.6$  Hz, 1H), 5.94 – 5.72 (m, 1H), 5.29 – 5.06 (m, 2H), 3.65 (t,  $J = 7.3$  Hz, 2H), 2.55 (m, 2H), 2.34 (s, 3H).  $^{13}\text{C}$  NMR (125 MHz,  $\text{CDCl}_3$ )  $\delta$  145.2, 136.2, 135.1, 133.1, 131.7, 131.5, 130.0, 128.0, 126.8, 118.6, 114.6, 114.4, 114.1, 108.9, 108.8, 49.7, 31.7, 21.6.

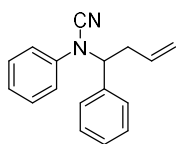

**1ba**

Purified by column chromatography (silica gel, EtOAc/Petroleum ether: 1/30) to afford the title compound (71% yield, 176 mg) as a yellow oil.  $^1\text{H}$  NMR (500 MHz,  $\text{CDCl}_3$ )  $\delta$  7.43 – 7.34 (m, 4H), 7.32 – 7.26 (m, 3H), 7.12 (d,  $J = 8.5$  Hz, 2H), 7.05 (t,  $J = 7.4$  Hz, 1H),  $\delta$  5.95 – 5.75 (m, 1H), 5.27 (d,  $J = 16.8$ , 1H), 5.17 (d,  $J = 10.2$ , 1H),  $\delta$  4.69 (dd,  $J = 9.3, 6.0$  Hz, 1H), 3.13 – 2.97 (m, 1H), 2.85 – 2.69 (m, 1H).  $^{13}\text{C}$  NMR (125 MHz,  $\text{CDCl}_3$ )  $\delta$  140.5, 139.3, 133.1, 129.7, 129.1, 128.5, 126.4, 124.1, 119.2, 117.3, 112.7, 62.5, 39.9.

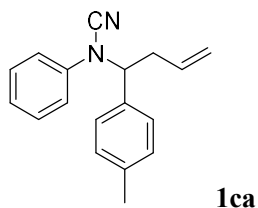

Purified by column chromatography (silica gel, EtOAc/Petroleum ether: 1/30) to afford the title compound (74% yield, 194 mg) as a yellow oil. <sup>1</sup>H NMR (400 MHz, CDCl<sub>3</sub>) δ 7.33 – 7.26 (m, 4H), 7.17 (d, *J* = 7.9 Hz, 2H), 7.12 (d, *J* = 8.7 Hz, 2H), 7.05 (t, *J* = 7.4 Hz, 1H), 5.94 – 5.70 (m, 1H), 5.43 – 5.08 (m, 2H), 4.66 (dd, *J* = 9.1, 6.1 Hz, 1H), 3.10 – 2.96 (m, 1H), 2.85 – 2.69 (m, 1H), 2.33 (s, 3H). <sup>13</sup>C NMR (125 MHz, CDCl<sub>3</sub>) δ 140.5, 138.2, 136.1, 133.2, 129.7, 129.6, 126.3, 124.0, 120.0, 117.3, 112.7, 62.4, 39.8, 21.1. HRMS (ESI) *m/z*: [M + H]<sup>+</sup> Calcd for C<sub>18</sub>H<sub>19</sub>N<sub>2</sub> 263.1543; Found 263.1553.

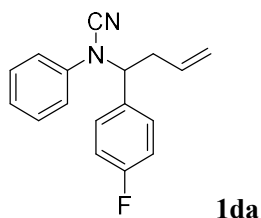

Purified by column chromatography (silica gel, EtOAc/Petroleum ether: 1/30) to afford the title compound (71% yield, 189 mg) as a yellow oil. <sup>1</sup>H NMR (400 MHz, CDCl<sub>3</sub>) δ 7.47 – 7.39 (m, 2H), 7.38 – 7.31 (m, 2H), 7.19 – 7.04 (m, 5H), 5.94 – 5.71 (m, 1H), 5.40 – 5.07 (m, 2H), 4.72 (dd, *J* = 9.0, 6.3 Hz, 1H), 3.17 – 2.97 (m, 1H), 2.89 – 2.68 (m, 1H). <sup>13</sup>C NMR (125 MHz, CDCl<sub>3</sub>) δ 162.8 (d, *J* = 248.0 Hz), 140.3, 134.9, 132.8, 129.7, 128.2 (d, *J* = 8.4 Hz), 124.3, 119.4, 117.4, 116.1 (d, *J* = 21.6 Hz), 112.5, 62.1, 39.7. <sup>19</sup>F NMR (376 MHz, CDCl<sub>3</sub>) δ -113.20. HRMS (ESI) *m/z*: [M + H]<sup>+</sup> Calcd for C<sub>17</sub>H<sub>16</sub>FN<sub>2</sub> 267.1292; Found 267.1300.

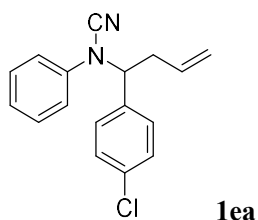

Purified by column chromatography (silica gel, EtOAc/Petroleum ether: 1/30) to afford the title compound (69% yield, 195 mg) as a yellow oil. <sup>1</sup>H NMR (500 MHz, CDCl<sub>3</sub>) δ 7.33 (brs, 4H), 7.32 – 7.28 (m, 2H), 7.14 – 7.05 (m, 3H), 5.86 – 5.73 (m, 1H), 5.27 (dt, *J* = 17.1, 1.5 Hz, 1H), 5.18 (dd, *J* = 10.3, 1.5 Hz, 1H), 4.70 – 4.63 (m, 1H), 3.08

–2.95 (m, 1H), 2.81 – 2.67 (m, 1H).  $^{13}\text{C}$  NMR (125 MHz,  $\text{CDCl}_3$ )  $\delta$  140.2, 137.7, 134.3, 132.6, 129.7, 129.3, 127.8, 124.3, 119.5, 117.4, 112.4, 62.1, 39.6. HRMS (ESI)  $m/z$ :  $[\text{M} + \text{H}]^+$  Calcd for  $\text{C}_{17}\text{H}_{16}\text{ClN}_2$  283.0997; Found 283.1002.

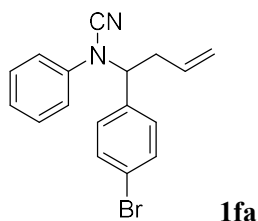

Purified by column chromatography (silica gel, EtOAc/Petroleum ether: 1/30) to afford the title compound (75% yield, 245 mg) as a yellow oil.  $^1\text{H}$  NMR (400 MHz,  $\text{CDCl}_3$ )  $\delta$  7.50 (d,  $J = 8.4$  Hz, 2H), 7.33 – 7.27 (m, 3H), 7.12 – 7.06 (m, 3H), 5.89 – 5.69 (m, 1H), 5.34 – 5.11 (m, 2H), 4.65 (dd,  $J = 9.0, 6.2$  Hz, 1H), 3.08 – 2.96 (m, 1H), 2.84 – 2.69 (m, 1H).  $^{13}\text{C}$  NMR (125 MHz,  $\text{CDCl}_3$ )  $\delta$  140.2, 138.2, 132.6, 132.3, 129.7, 128.1, 124.3, 122.4, 119.5, 117.4, 112.4, 62.1, 39.6. HRMS (ESI)  $m/z$ :  $[\text{M} + \text{H}]^+$  Calcd for  $\text{C}_{17}\text{H}_{16}\text{BrN}_2$  327.0491; Found 327.0493.

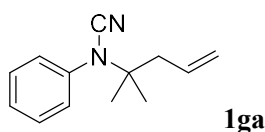

Purified by column chromatography (silica gel, EtOAc/Petroleum ether: 1/30) to afford the title compound (77% yield, 154 mg) as a colorless oil.  $^1\text{H}$  NMR (500 MHz,  $\text{CDCl}_3$ )  $\delta$  7.44 – 7.37 (m, 2H), 7.37 – 7.33 (m, 1H), 7.33 – 7.28 (m, 2H), 5.95 – 5.86 (m, 1H), 5.47 – 4.99 (m, 2H), 2.45 (dt,  $J = 7.3, 1.2$  Hz, 2H), 1.32 (s, 6H).  $^{13}\text{C}$  NMR (125 MHz,  $\text{CDCl}_3$ )  $\delta$  138.1, 132.7, 129.4, 128.4, 128.2, 119.5, 115.8, 61.1, 44.9, 26.0. HRMS (ESI)  $m/z$ :  $[\text{M} + \text{H}]^+$  Calcd for  $\text{C}_{13}\text{H}_{17}\text{N}_2$  201.1386; Found 201.1388

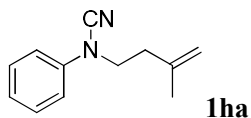

Purified by column chromatography (silica gel, EtOAc/Petroleum ether: 1/12) to afford the title compound (79% yield, 147 mg) as a colorless oil.  $^1\text{H}$  NMR (400 MHz,  $\text{CDCl}_3$ )  $\delta$  7.41 – 7.33 (m, 2H), 7.15 – 7.07 (m, 3H), 4.92 – 4.87 (m, 1H), 4.79 (s, 1H), 3.71 (t,  $J = 7.7$  Hz, 2H), 2.51 (t,  $J = 7.5$  Hz, 2H), 1.81 (s, 3H).  $^{13}\text{C}$  NMR (100 MHz,  $\text{CDCl}_3$ )  $\delta$  140.8, 139.8, 129.7, 123.6, 116.0, 113.5, 113.3, 47.8, 35.1, 22.5.

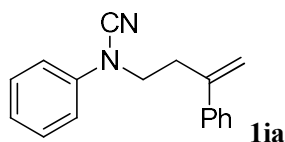

Purified by column chromatography (silica gel, EtOAc/Petroleum ether: 1/15) to afford the title compound (80% yield, 199 mg) as colorless oil.  $^1\text{H NMR}$  (400 MHz,  $\text{CDCl}_3$ )  $\delta$  7.43 – 7.28 (m, 7H), 7.11-7.04 (m, 3H), 5.41 (brs, 1H), 5.20-5.19 (m, 1H), 3.70-3.68 (m, 2H), 3.02 (t,  $J = 7.4$ , 2H).  $^{13}\text{C NMR}$  (125 MHz,  $\text{CDCl}_3$ )  $\delta$  143.9, 139.8, 129.7, 128.7, 128.05, 126.2, 123.7, 116.1, 115.7, 113.5, 48.3, 33.4. HRMS(ESI): calcd. for  $\text{C}_{17}\text{H}_{17}\text{N}_2$  ( $[\text{M}+\text{H}]^+$ ): 249.1386, found 249.1391.

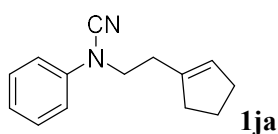

Purified by column chromatography (silica gel, EtOAc/Petroleum ether: 1/15) to afford the title compound (82% yield, 174 mg) as a colorless oil.  $^1\text{H NMR}$  (500 MHz,  $\text{CDCl}_3$ )  $\delta$  7.40 – 7.33 (m, 2H), 7.21 – 6.92 (m, 3H), 5.50 – 5.45 (m, 1H), 3.71 (t,  $J = 7.3$  Hz, 2H), 2.58 (t,  $J = 7.3$  Hz, 2H), 2.40 – 2.17 (m, 4H), 1.95 – 1.82 (m, 2H).  $^{13}\text{C NMR}$  (125 MHz,  $\text{CDCl}_3$ )  $\delta$  140.0, 139.4, 129.7, 127.0, 123.6, 116.0, 113.6, 48.0, 35.2, 32.7, 29.1, 23.4.

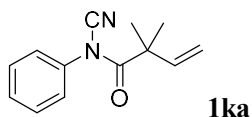

Purified by column chromatography (silica gel, EtOAc/Petroleum ether: 1/15) to afford the title compound (71% yield, 152 mg) as a colorless oil.  $^1\text{H NMR}$  (400 MHz,  $\text{CDCl}_3$ )  $\delta$  7.54 – 7.41 (m, 3H), 7.38 – 7.31 (m, 2H), 6.23 (dd,  $J = 17.5, 10.6$  Hz, 1H), 5.50 – 5.30 (m, 2H), 1.61 (s, 6H).  $^{13}\text{C NMR}$  (125 MHz,  $\text{CDCl}_3$ )  $\delta$  174.9, 140.4, 136.1, 129.7, 129.1, 126.2, 117.0, 110.3, 47.2, 25.8. HRMS (ESI)  $m/z$ :  $[\text{M} + \text{H}]^+$  Calcd for  $\text{C}_{13}\text{H}_{15}\text{N}_2\text{O}$  215.1179; Found 215.1172.

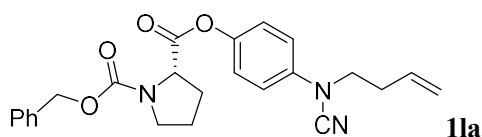

Purified by column chromatography (silica gel, EtOAc/Petroleum ether: 1/10) to afford the title compound (68% yield, 285 mg; the mixture of rotamers: 1/1) as a yellow oil. The mixture of rotamers:  $^1\text{H NMR}$  (500 MHz,  $\text{CDCl}_3$ )  $\delta$  7.43 – 7.31 (m, 10H), 7.15 (d,  $J = 9.3$  Hz, 1H), 7.12 (d,  $J = 9.3$  Hz, 1H), 7.04 (d,  $J = 9.1$  Hz, 2H), 6.80 (d,  $J = 9.0$  Hz,

2H), 5.90 – 5.80 (m, 2H), 5.28 (d,  $J = 12.3$  Hz, 1H), 5.25 – 5.15 (m, 6H), 5.10 (d,  $J = 12.3$  Hz, 1H), 4.61 (dd,  $J = 8.5$ , 4.3 Hz, 1H), 4.56 (dd,  $J = 8.7$ , 4.2 Hz, 1H), 3.77 – 3.51 (m, 8H), 2.65 – 2.52 (m, 4H), 2.47 – 2.33 (m, 2H), 2.28 – 2.14 (m, 2H), 2.15 – 1.91 (m, 4H).  $^{13}\text{C}$  NMR (125 MHz,  $\text{CDCl}_3$ )  $\delta$  171.4, 171.4, 155.0, 154.2, 146.6, 146.3, 137.6, 137.6, 136.6, 136.4, 133.0, 132.9, 129.6, 128.6, 128.5, 128.2, 128.0, 127.9, 122.7, 122.5, 118.74, 118.72, 117.02, 116.96, 115.3, 113.4, 113.3, 67.3, 67.2, 59.4, 58.9, 49.20, 49.17, 47.1, 46.6, 31.6, 31.1, 30.0, 24.5, 23.7. HRMS (ESI)  $m/z$ :  $[\text{M} + \text{H}]^+$  Calcd for  $\text{C}_{24}\text{H}_{26}\text{N}_3\text{O}_4$  420.1918; Found 420.1912.

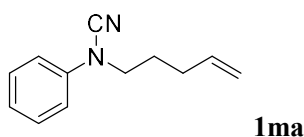

Purified by column chromatography (silica gel, EtOAc/Petroleum ether: 1/8) to afford the title compound (84% yield, 156 mg) as a colorless oil.  $^1\text{H}$  NMR (500 MHz,  $\text{CDCl}_3$ )  $\delta$  7.45 – 7.31 (m, 2H), 7.21 – 7.02 (m, 3H), 5.80 (ddt,  $J = 16.9$ , 10.1, 6.6 Hz, 1H), 5.28 – 4.93 (m, 2H), 3.62 – 3.57 (m, 2H), 2.22 (q,  $J = 7.1$  Hz, 2H), 1.96-1.91 (m, 2H).  $^{13}\text{C}$  NMR (125 MHz,  $\text{CDCl}_3$ )  $\delta$  140.1, 136.7, 129.8, 123.7, 116.4, 116.0, 113.7, 48.8, 30.5, 26.6.

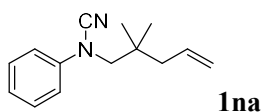

Purified by column chromatography (silica gel, EtOAc/Petroleum ether: 1/15) to afford the title compound (74% yield, 158 mg) as a colorless oil.  $^1\text{H}$  NMR (400 MHz,  $\text{CDCl}_3$ )  $\delta$  7.39 (t,  $J = 7.6$  Hz, 2H), 7.23 (d,  $J = 7.8$  Hz, 1H), 7.13 (t,  $J = 7.4$  Hz, 1H), 5.92 – 5.73 (m, 1H), 5.18 – 5.04 (m, 2H), 3.53 (s, 2H), 2.15 (d,  $J = 7.4$  Hz, 1H), 1.07 (s, 6H).  $^{13}\text{C}$  NMR (125 MHz,  $\text{CDCl}_3$ )  $\delta$  141.3, 133.5, 129.6, 123.7, 118.7, 116.7, 115.3, 59.4, 44.8, 37.3, 25.3. HRMS (ESI)  $m/z$ :  $[\text{M} + \text{H}]^+$  Calcd for  $\text{C}_{14}\text{H}_{19}\text{N}_2$  215.1543; Found 215.1540.

#### IV. General Procedure and Electrochemical Reactions

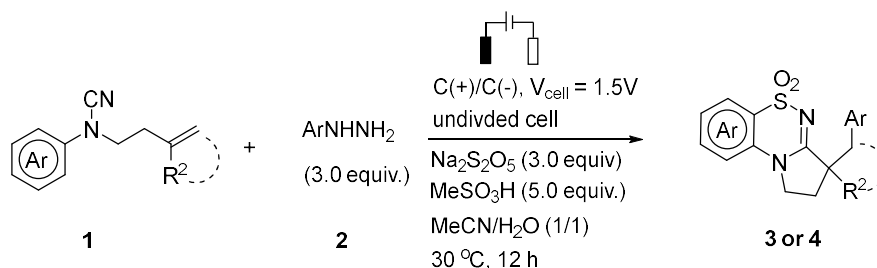

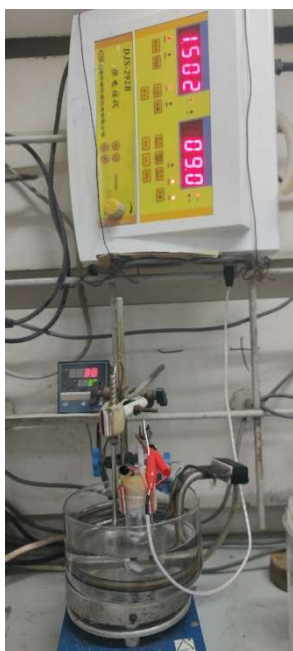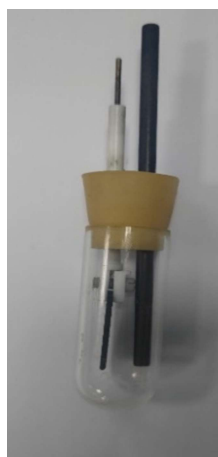

In an undivided flask (20 mL) equipped with a stir bar, a mixture of *N*-aryl cyanamides **1** (0.3 mmol), ArNHNH<sub>2</sub> **2** (0.9 mmol), Na<sub>2</sub>S<sub>2</sub>O<sub>5</sub> (0.9 mmol), MeSO<sub>3</sub>H (1.5 mmol) and MeCN/H<sub>2</sub>O (v/v = 1/1, 10 mL) were added. The cell was equipped with graphite rod anode (Φ 6 mm) and graphite plate cathode (1.5×1.5×0.2 cm), then connected to a DC regulated power supply. The reaction mixture was stirred and electrolyzed at a constant voltage of 1.5 V at 30 °C for 12 h. When the reaction was finished, the mixture was extracted with EtOAc (10 mL× 3). The combined organic layer was washed with brine, dried over Na<sub>2</sub>SO<sub>4</sub>, filtered, and concentrated *in vacuo*. The residue was purified by column chromatography (silica gel, EtOAc/Petroleum ether) to provide the desired products **3**.

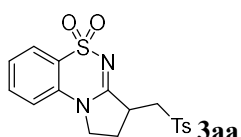

After stirring at 30 °C for 12 hours, the residue was purified by column chromatography (silica gel, EtOAc/Petroleum ether: 1/1) to afford the title compound (71% yield, 83 mg) as a white solid. mp: 240.7 °C. <sup>1</sup>H NMR (400 MHz, CDCl<sub>3</sub>) δ 7.99 (d, *J* = 7.9 Hz, 1H), 7.86 (d, *J* = 7.9 Hz, 2H), 7.68 (t, *J* = 7.9 Hz, 1H), 7.50 (t, *J* = 7.7 Hz, 1H), 7.43 (d, *J* = 7.9 Hz, 2H), 7.11 (d, *J* = 8.4 Hz, 1H), 4.23 (t, *J* = 9.6 Hz, 1H), 4.09 – 3.98 (m, 1H), 3.95-3.91 (m, 1H), 3.75-3.67 (m, 1H), 3.26 (dd, *J* = 14.0, 11.2 Hz, 1H), 3.04 – 2.88 (m, 1H), 2.50 (s, 3H), 2.46 – 2.29 (m, 1H). <sup>13</sup>C NMR (125 MHz, CDCl<sub>3</sub>) δ 161.4, 145.5, 136.0, 134.4, 133.3, 130.3, 128.0, 127.0, 125.3, 122.0, 115.0, 57.5, 48.3, 39.6, 25.8, 21.7. HRMS (ESI) *m/z*: [M + H]<sup>+</sup> Calcd for C<sub>18</sub>H<sub>19</sub>N<sub>2</sub>O<sub>4</sub>S<sub>2</sub> 391.0781; Found 391.0792.

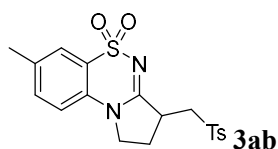

After stirring at 30 °C for 12 hours, the residue was purified by column chromatography (silica gel, EtOAc/Petroleum ether: 1/1) to afford the title compound (68% yield, 82 mg) as a white solid. mp: 248.7 °C. <sup>1</sup>H NMR (500 MHz, CDCl<sub>3</sub>) δ 7.84 (d, *J* = 8.0 Hz, 2H), 7.76 (s, 1H), 7.45 (d, *J* = 8.6 Hz, 1H), 7.41 (d, *J* = 8.0 Hz, 2H), 6.99 (d, *J* = 8.5 Hz, 1H), 4.25 – 4.13 (m, 1H), 4.04 – 3.95 (m, 1H), 3.93 – 3.87 (m, 1H), 3.71 – 3.62 (m, 1H), 3.32 – 3.18 (m, 1H), 2.97 – 2.85 (m, 1H), 2.48 (s, 3H), 2.44 (s, 3H), 2.37 – 2.26 (m, 1H). <sup>13</sup>C NMR (125 MHz, CDCl<sub>3</sub>) δ 161.1, 145.5,

137.6, 136.0, 134.1, 132.1, 130.2, 128.0, 124.9, 121.8, 115.0, 57.5, 48.2, 39.6, 25.8, 21.7, 21.1. HRMS (ESI) m/z: [M + H]<sup>+</sup> Calcd for C<sub>19</sub>H<sub>21</sub>N<sub>2</sub>O<sub>4</sub>S<sub>2</sub> 405.0937; Found 405.0949.

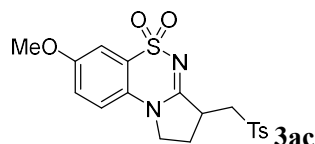

After stirring at 30 °C for 12 hours, the residue was purified by column chromatography (silica gel, EtOAc/Petroleum ether: 1/1) to afford the title compound (58% yield, 73 mg) as a white solid. mp: 228.4 °C. <sup>1</sup>H NMR (400 MHz, CDCl<sub>3</sub>) δ 7.96 – 7.80 (m, 2H), 7.52 – 7.37 (m, 3H), 7.19 (dd, *J* = 9.1, 2.8 Hz, 1H), 7.02 (d, *J* = 9.2 Hz, 1H), 4.24 – 4.14 (m, 1H), 4.05 – 3.94 (m, 1H), 3.94 – 3.84 (m, 4H), 3.72 – 3.60 (m, 1H), 3.29 – 3.15 (m, 1H), 2.98 – 2.84 (m, 1H), 2.47 (s, 3H), 2.41 – 2.27 (m, 1H). <sup>13</sup>C NMR (125 MHz, CDCl<sub>3</sub>) δ 160.6, 158.3, 145.5, 136.0, 130.2, 128.0, 122.8, 121.8, 116.7, 107.0, 57.5, 56.0, 48.3, 39.5, 25.7, 21.7. HRMS (ESI) m/z: [M + H]<sup>+</sup> Calcd for C<sub>19</sub>H<sub>21</sub>N<sub>2</sub>O<sub>5</sub>S<sub>2</sub> 421.0886; Found 421.0889.

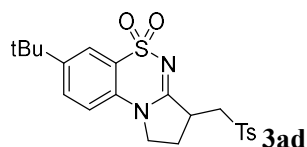

After stirring at 30 °C for 12 hours, the residue was purified by column chromatography (silica gel, EtOAc/Petroleum ether: 1/1) to afford the title compound (66% yield, 88 mg) as a white solid. mp: 210.8 °C. <sup>1</sup>H NMR (400 MHz, CDCl<sub>3</sub>) δ 7.95 – 7.92 (m, 1H), 7.81 (d, *J* = 8.0 Hz, 2H), 7.69 – 7.63 (m, 1H), 7.38 (d, *J* = 7.9 Hz, 2H), 7.04 (d, *J* = 8.8 Hz, 1H), 4.22 – 4.13 (m, 1H), 4.03 – 3.94 (m, 1H), 3.92 – 3.84 (m, 1H), 3.70 – 3.58 (m, 1H), 3.29 – 3.20 (m, 1H), 2.91 – 2.79 (m, 1H), 2.46 (s, 3H), 2.36 – 2.19 (m, 1H), 1.33 (s, 9H). <sup>13</sup>C NMR (125 MHz, CDCl<sub>3</sub>) δ 161.2, 150.9, 145.5, 136.0, 132.0, 130.9, 130.2, 128.0, 121.5, 121.2, 115.1, 57.5, 48.3, 39.6, 35.1, 31.0, 25.7, 21.7. HRMS (ESI) m/z: [M + H]<sup>+</sup> Calcd for C<sub>22</sub>H<sub>27</sub>N<sub>2</sub>O<sub>4</sub>S<sub>2</sub> 447.1407; Found 447.1419.

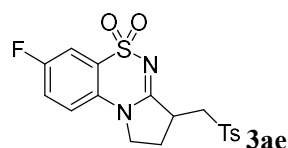

After stirring at 30 °C for 12 hours, the residue was purified by column chromatography (silica gel, EtOAc/Petroleum ether: 1/1) to afford the title compound (64% yield, 78 mg) as a white solid. mp: 221.2 °C. <sup>1</sup>H NMR (400 MHz, CDCl<sub>3</sub>)

$\delta$  7.83 (d,  $J$  = 8.3 Hz, 2H), 7.63 – 7.57 (m, 1H), 7.40 (d,  $J$  = 8.0 Hz, 2H), 7.37 – 7.32 (m, 1H), 7.14 – 7.06 (m, 1H), 4.18 (td,  $J$  = 9.6, 2.0 Hz, 1H), 4.08 – 3.96 (m, 1H), 3.92 – 3.82 (m, 1H), 3.75 – 3.63 (m, 1H), 3.30 – 3.18 (m, 1H), 2.96 – 2.84 (m, 1H), 2.47 (s, 3H), 2.41 – 2.26 (m, 1H).  $^{13}\text{C}$  NMR (100 MHz, DMSO)  $\delta$  162.7, 159.7 (d,  $J$  = 247.7 Hz), 145.4, 136.4, 131.8, 130.6, 128.4, 122.9, 121.7 (d,  $J$  = 23.5 Hz), 119.9 (d,  $J$  = 8.3 Hz), 110.9 (d,  $J$  = 25.5 Hz), 57.0, 49.2, 25.2, 21.6.  $^{19}\text{F}$  NMR (376 MHz,  $\text{CDCl}_3$ )  $\delta$  -110.68. HRMS (ESI)  $m/z$ :  $[\text{M} + \text{H}]^+$  Calcd for  $\text{C}_{18}\text{H}_{18}\text{FN}_2\text{O}_4\text{S}_2$  409.0687; Found 409.0697.

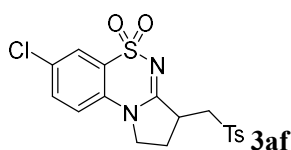

After stirring at 30 °C for 12 hours, the residue was purified by column chromatography (silica gel, EtOAc/Petroleum ether: 1/1) to afford the title compound (56% yield, 71 mg) as a white solid. mp: 231.7 °C.  $^1\text{H}$  NMR (400 MHz,  $\text{CDCl}_3$ )  $\delta$  7.88 – 7.77 (m, 3H), 7.60 – 7.50 (m, 1H), 7.39 (d,  $J$  = 8.1 Hz, 2H), 7.01 (d,  $J$  = 8.9 Hz, 1H), 4.18-4.13 (m, 1H), 4.04 – 3.95 (m, 1H), 3.87 – 3.80 (m, 1H), 3.73 – 3.62 (m, 1H), 3.25 (dd,  $J$  = 14.0, 11.0 Hz, 1H), 2.93 – 2.81 (m, 1H), 2.46 (s, 3H), 2.38 – 2.26 (m, 1H).  $^{13}\text{C}$  NMR (125MHz,  $\text{CDCl}_3$ )  $\delta$  161.8, 145.6, 135.9, 133.4, 132.9, 132.3, 130.3, 128.0, 124.8, 122.8, 116.8, 57.4, 48.5, 39.6, 25.6, 21.7. HRMS (ESI)  $m/z$ :  $[\text{M} + \text{H}]^+$  Calcd for  $\text{C}_{18}\text{H}_{18}\text{ClN}_2\text{O}_4\text{S}_2$  425.0391; Found 425.0403.

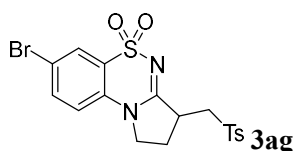

After stirring at 30 °C for 12 hours, the residue was purified by column chromatography (silica gel, EtOAc/Petroleum ether: 1/1) to afford the title compound (55% yield, 77 mg) as a white solid. mp: 243.6 °C.  $^1\text{H}$  NMR (400 MHz,  $\text{CDCl}_3$ )  $\delta$  7.93 (m, 1H), 7.82 (d,  $J$  = 8.4 Hz, 2H), 7.69 (m, 1H), 7.39 (d,  $J$  = 8.1 Hz, 2H), 6.94 (d,  $J$  = 8.9 Hz, 1H), 4.17-4.11 (m, 1H), 4.02-3.96 (m, 1H), 3.88 – 3.77 (m, 1H), 3.73 – 3.58 (m, 1H), 3.37 – 3.18 (m, 1H), 2.93 – 2.79 (m, 1H), 2.46 (s, 3H), 2.36 – 2.23 (m, 1H).  $^{13}\text{C}$  NMR (125 MHz,  $\text{CDCl}_3$ )  $\delta$  161.8, 145.6, 136.2, 135.9, 133.3, 130.3, 128.0, 127.7, 123.0, 119.4, 117.0, 57.4, 48.5, 39.7, 25.5, 21.7. HRMS (ESI)  $m/z$ :  $[\text{M} + \text{H}]^+$  Calcd for  $\text{C}_{18}\text{H}_{18}\text{BrN}_2\text{O}_4\text{S}_2$  468.9886; Found 468.9879.



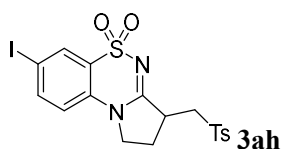

After stirring at 30 °C for 12 hours, the residue was purified by column chromatography (silica gel, EtOAc/Petroleum ether: 1/1) to afford the title compound (42% yield, 64 mg) as a white solid. mp: 254.7 °C. <sup>1</sup>H NMR (500 MHz, CDCl<sub>3</sub>) δ 8.19 (d, *J* = 1.9 Hz, 1H), 7.93 (dd, *J* = 8.7, 2.0 Hz, 1H), 7.84 (d, *J* = 8.0 Hz, 2H), 7.42 (d, *J* = 8.2 Hz, 2H), 6.83 (d, *J* = 8.8 Hz, 1H), 4.19-4.15 (m, 1H), 4.05 – 3.96 (m, 1H), 3.98-3.85 (m, 1H), 3.74 – 3.59 (m, 1H), 3.26 (dd, *J* = 14.0, 11.0 Hz, 1H), 2.96 – 2.85 (m, 1H), 2.49 (s, 3H), 2.42 – 2.27 (m, 1H). <sup>13</sup>C NMR (125 MHz, CDCl<sub>3</sub>) δ 161.6, 145.6, 141.9, 135.9, 133.8, 133.6, 130.3, 128.0, 123.2, 116.8, 89.5, 57.4, 48.3, 39.7, 25.6, 21.7. HRMS (ESI) *m/z*: [M + H]<sup>+</sup> Calcd for C<sub>18</sub>H<sub>18</sub>IN<sub>2</sub>O<sub>4</sub>S<sub>2</sub> 516.9747; Found 516.9759.

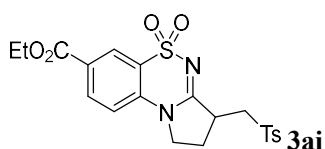

After stirring at 30 °C for 12 hours, the residue was purified by column chromatography (silica gel, EtOAc/Petroleum ether: 1/1) to afford the title compound (27% yield, 37 mg) as a white solid. mp: 217.3 °C. <sup>1</sup>H NMR (400 MHz, CDCl<sub>3</sub>) δ 8.54 (d, *J* = 1.9 Hz, 1H), 8.25 (dd, *J* = 8.7, 1.9 Hz, 1H), 7.84 (d, *J* = 8.3 Hz, 2H), 7.40 (d, *J* = 8.0 Hz, 2H), 7.11 (d, *J* = 8.7 Hz, 1H), 4.40 (q, *J* = 7.1 Hz, 2H), 4.22 (td, *J* = 9.6, 1.8 Hz, 1H), 4.11 – 4.00 (m, 1H), 3.94 – 3.82 (m, 1H), 3.80 – 3.62 (m, 1H), 3.36 – 3.20 (m, 1H), 3.02 – 2.87 (m, 1H), 2.47 (s, 3H), 2.44 – 2.25 (m, 1H), 1.41 (t, *J* = 7.1 Hz, 4H). <sup>13</sup>C NMR (125 MHz, CDCl<sub>3</sub>) δ 164.1, 162.0, 145.6, 137.3, 135.9, 134.1, 130.2, 129.0, 128.0, 127.1, 121.6, 115.2, 61.9, 57.4, 48.6, 39.7, 25.7, 21.7, 14.3. HRMS (ESI) *m/z*: [M + H]<sup>+</sup> Calcd for C<sub>21</sub>H<sub>23</sub>N<sub>2</sub>O<sub>6</sub>S<sub>2</sub> 463.0992; Found 463.1001.

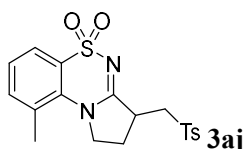

After stirring at 30 °C for 12 hours, the residue was purified by column chromatography (silica gel, EtOAc/Petroleum ether: 1/1) to afford the title compound (59% yield, 71 mg) as a white solid. mp: 237.1 °C. <sup>1</sup>H NMR (400 MHz, CDCl<sub>3</sub>) δ 7.94 – 7.81 (m, 3H), 7.52 – 7.41 (m, 3H), 7.37 (t, *J* = 7.7 Hz, 1H), 4.69 – 4.59 (m, 1H), 4.57 – 4.46 (m, 1H), 3.97 (dd, *J* = 14.1, 2.6 Hz, 1H), 3.73 – 3.56 (m, 1H), 3.21 (dd, *J* = 14.1, 11.2 Hz, 1H), 2.99 – 2.90 (m, 1H), 2.77 (s, 3H),

2.51 (s, 3H), 2.33 – 2.16 (m, 1H). <sup>13</sup>C NMR (125 MHz, CDCl<sub>3</sub>) δ 163.3, 145.5, 137.7, 136.1, 134.3, 130.2, 127.9, 127.1, 125.4, 123.9, 123.6, 57.4, 53.2, 38.7, 27.2, 23.3, 21.7. HRMS (ESI) m/z: [M + H]<sup>+</sup> Calcd for C<sub>19</sub>H<sub>21</sub>N<sub>2</sub>O<sub>4</sub>S<sub>2</sub> 405.0937; Found 405.0930.

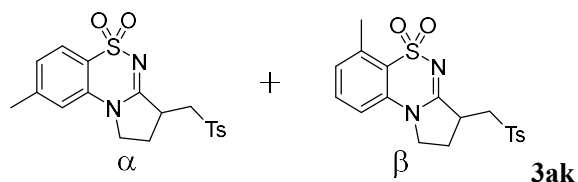

After stirring at 30 °C for 12 hours, the residue was purified by column chromatography (silica gel, EtOAc/Petroleum ether: 1/1) to afford the title compound (57% yield, 37 mg) as an inseparable white solid ( $\alpha/\beta = 1.3/1$ ). Major isomer ( $\alpha$ ) <sup>1</sup>H NMR (400 MHz, CDCl<sub>3</sub>) δ 7.86 – 7.79 (m, 2H), 7.43 – 7.36 (m, 2H), 7.26 – 7.18 (m, 2H), 6.86 (s, 1H), 4.21 – 4.11 (m, 1H), 4.03 – 3.92 (m, 1H), 3.93 – 3.83 (m, 1H), 3.72 – 3.55 (m, 1H), 3.25 – 3.13 (m, 1H), 2.93 – 2.81 (m, 1H), 2.46 (brs, 6H), 2.36 – 2.20 (m, 1H). The minor isomer: <sup>1</sup>H NMR (400 MHz, CDCl<sub>3</sub>) δ 7.86 – 7.79 (m, 3H), 7.49 (t, *J* = 8.0 Hz, 1H), 7.43 – 7.36 (m, 2H), 6.90 (d, *J* = 8.4 Hz, 1H), 4.21 – 4.11 (m, 1H), 4.03 – 3.92 (m, 1H), 3.93 – 3.83 (m, 1H), 3.72 – 3.55 (m, 1H), 3.25 – 3.13 (m, 1H), 2.93 – 2.81 (m, 1H), 2.72 (s, 3H), 2.45 (s, 3H), 2.36 – 2.20 (m, 1H). <sup>13</sup>C NMR (125 MHz, CDCl<sub>3</sub>) δ 161.4, 159.7, 145.5, 144.4, 138.1, 135.9, 134.6, 134.8, 132.5, 130.2, 129.8, 127.98, 127.96, 125.0, 120.9, 119.3, 115.2, 113.1, 57.5, 57.4, 48.7, 48.2, 39.6, 39.5, 25.8, 25.7, 22.0, 21.7, 19.9. HRMS (ESI) m/z: [M + H]<sup>+</sup> Calcd for C<sub>19</sub>H<sub>21</sub>N<sub>2</sub>O<sub>4</sub>S<sub>2</sub> 405.0937; Found 463.0939.

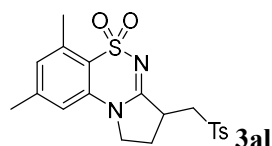

After stirring at 30 °C for 12 hours, the residue was purified by column chromatography (silica gel, EtOAc/Petroleum ether: 1/1) to afford the title compound (61% yield, 76 mg) as a white solid. mp: 253.5 °C. <sup>1</sup>H NMR (500 MHz, CDCl<sub>3</sub>) δ 7.82 (d, *J* = 8.0 Hz, 2H), 7.39 (d, *J* = 8.0 Hz, 2H), 7.04 (s, 1H), 6.69 (s, 1H), 4.15 (t, *J* = 9.7 Hz, 1H), 3.99-3.94 (m, 1H), 3.91-3.88 (m, 1H), 3.68-3.62 (m, 1H), 3.21 (dd, *J* = 14.1, 11.3 Hz, 1H), 2.93 – 2.82 (m, 1H), 2.68 (s, 3H), 2.47 (s, 3H), 2.40 (s, 3H), 2.35 – 2.22 (m, 1H). <sup>13</sup>C NMR (125 MHz, CDCl<sub>3</sub>) δ 159.6, 145.5, 143.3, 137.9, 136.0, 134.6, 130.7, 130.2, 128.0, 118.4, 113.3, 57.4, 48.6, 39.5, 25.7, 21.7, 21.7, 19.8. HRMS (ESI) m/z: [M + H]<sup>+</sup> Calcd for C<sub>20</sub>H<sub>23</sub>N<sub>2</sub>O<sub>4</sub>S<sub>2</sub> 419.1094; Found 419.1090.

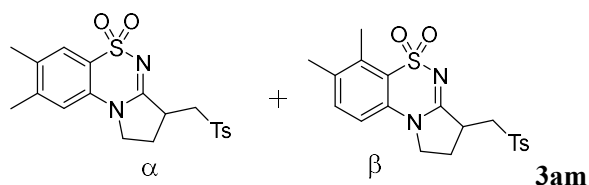

After stirring at 30 °C for 12 hours, the residue was purified by column chromatography (silica gel, EtOAc/Petroleum ether (1/1) to afford the title compound (53 % yield, 66 mg) as an inseparable mixture white solid ( $\alpha/\beta = 4.2/1$ ). Major isomer ( $\alpha$ )  $^1\text{H NMR}$  (400 MHz,  $\text{CDCl}_3$ )  $\delta$  7.81 (dd,  $J = 8.3, 2.9$  Hz, 2H), 7.66 (s, 1H), 7.48 – 7.32 (m, 2H), 6.83 (s, 1H), 4.26 – 4.09 (m, 1H), 4.04 – 3.92 (m, 1H), 3.91 – 3.82 (m, 1H), 3.71 – 3.53 (m, 1H), 3.22 (dd,  $J = 14.1, 11.3$  Hz, 1H), 2.85 (dt,  $J = 14.1, 7.6$  Hz, 1H), 2.63 (s, 1H), 2.46 (s, 3H), 2.37 – 2.24 (m, 3H). The minor isomer:  $^1\text{H NMR}$  (400 MHz,  $\text{CDCl}_3$ )  $\delta$  7.81 (dd,  $J = 8.3, 2.9$  Hz, 2H), 7.48 – 7.32 (m, 2H), 7.36 (s, 1H), 6.80 (s, 1H), 4.26 – 4.09 (m, 1H), 4.04 – 3.92 (m, 1H), 3.91 – 3.82 (m, 1H), 3.71 – 3.53 (m, 1H), 3.22 (dd,  $J = 14.1, 11.3$  Hz, 1H), 2.85 (dt,  $J = 14.1, 7.6$  Hz, 1H), 2.63 (s, 1H), 2.46 (s, 3H), 2.37 – 2.24 (m, 3H).  $^{13}\text{C NMR}$  (125 MHz,  $\text{CDCl}_3$ )  $\delta$  161.0, 159.2, 145.5, 143.2, 136.9, 136.5, 136.01, 135.98, 134.0, 132.7, 132.3, 130.2, 129.5, 128.5, 128.0, 125.1, 121.6, 119.3, 115.8, 112.8, 57.5, 57.4, 48.5, 39.5, 39.4, 25.7, 25.6, 21.7, 20.5, 19.4, 16.4. HRMS (ESI)  $m/z$ :  $[\text{M} + \text{H}]^+$  Calcd for  $\text{C}_{20}\text{H}_{23}\text{N}_2\text{O}_4\text{S}_2$  419.1094; Found 419.1098.

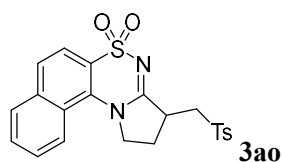

After stirring at 30 °C for 12 hours, the residue was purified by column chromatography (silica gel, EtOAc/Petroleum ether: 1/1) to afford the title compound (29% yield, 38 mg) as a white solid. mp: 257.2 °C.  $^1\text{H NMR}$  (500 MHz,  $\text{CDCl}_3$ )  $\delta$  8.51 (d,  $J = 8.6$  Hz, 1H), 7.99 – 7.93 (m, 2H), 7.97-7.94 (m, 3H), 7.74 – 7.64 (m, 2H), 7.44 (d,  $J = 7.9$  Hz, 2H), 4.96 – 4.90 (m, 1H), 4.82-4.79 (m, 1H), 4.03 (dd,  $J = 14.4, 2.6$  Hz, 1H), 3.84 – 3.74 (m, 1H), 3.23-3.21 (m, 1H), 3.13 – 3.02 (m, 1H), 2.51 (s, 3H), 2.34 – 2.20 (m, 1H).  $^{13}\text{C NMR}$  (125 MHz, DMSO)  $\delta$  164.2, 145.4, 136.4, 136.3, 133.4, 130.6, 129.8, 129.0, 128.40, 128.35, 127.9, 125.8, 123.2, 119.7, 118.1, 56.7, 55.6, 39.2, 27.4, 21.6. HRMS (ESI)  $m/z$ :  $[\text{M} + \text{H}]^+$  Calcd for  $\text{C}_{21}\text{H}_{23}\text{N}_2\text{O}_6\text{S}_2$  441.0937; Found 441.0922.

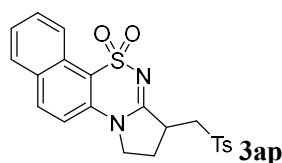

After stirring at 30 °C for 12 hours, the residue was purified by column chromatography (silica gel, EtOAc/Petroleum ether: 1/1) to afford the title compound (44% yield, 58 mg) as a white solid. mp: 255.5 °C. <sup>1</sup>H NMR (400 MHz, CDCl<sub>3</sub>) δ 8.91 (d, *J* = 8.4 Hz, 1H), 8.04 (d, *J* = 8.8 Hz, 1H), 7.89-7.86 (m, 3H), 7.72 (t, *J* = 7.5 Hz, 1H), 7.61 (t, *J* = 7.6 Hz, 1H), 7.44 (d, *J* = 7.9 Hz, 2H), 7.16 (d, *J* = 9.0 Hz, 1H), 4.34-4.16 (m, 1H), 4.18 – 4.06 (m, 1H), 3.97 (dd, *J* = 13.8, 2.6 Hz, 1H), 3.83 – 3.70 (m, 1H), 3.29 (dd, *J* = 13.7, 11.3 Hz, 1H), 3.06 – 2.91 (m, 1H), 2.51 (s, 3H), 2.46 – 2.30 (m, 1H). <sup>13</sup>C NMR (125 MHz, DMSO) δ 161.4, 145.4, 136.4, 134.7, 134.3, 131.3, 130.6, 129.5, 129.5, 128.4, 127.1, 127.0, 124.3, 116.1, 115.1, 57.0, 49.6, 25.3, 21.6. HRMS (ESI) *m/z*: [M + H]<sup>+</sup> Calcd for C<sub>21</sub>H<sub>23</sub>N<sub>2</sub>O<sub>6</sub>S<sub>2</sub> 441.0937; Found 441.0939.

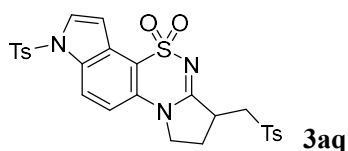

After stirring at 30 °C for 12 hours, the residue was purified by column chromatography (silica gel, EtOAc/Petroleum ether: 1/1) to afford the title compound (54% yield, 94 mg) as a white solid. mp: 225.8 °C. <sup>1</sup>H NMR (400 MHz, CDCl<sub>3</sub>) δ 8.09 (d, *J* = 9.0 Hz, 1H), 7.78 (d, *J* = 7.9 Hz, 2H), 7.74 – 7.65 (m, 3H), 7.34 (d, *J* = 7.9 Hz, 2H), 7.20 (d, *J* = 8.1 Hz, 2H), 7.12 (d, *J* = 3.7 Hz, 1H), 6.88 (d, *J* = 9.1 Hz, 1H), 4.19 – 4.01 (m, 1H), 4.01 – 3.90 (m, 1H), 3.85 (dd, *J* = 14.0, 2.6 Hz, 1H), 3.72 – 3.60 (m, 1H), 3.32 – 3.18 (m, 1H), 2.84-2.76 (m, 1H), 2.42 (s, 3H), 2.31 (s, 3H), 2.29 – 2.21 (m, 1H). <sup>13</sup>C NMR (125 MHz, CDCl<sub>3</sub>) δ 160.9, 146.0, 145.4, 136.0, 134.4, 132.8, 131.0, 129.7, 127.9, 125.8, 118.3, 112.8, 111.8, 107.7, 57.5, 48.9, 39.6, 25.6, 21.7, 21.6. HRMS (ESI) *m/z*: [M + H]<sup>+</sup> Calcd for C<sub>27</sub>H<sub>26</sub>N<sub>3</sub>O<sub>6</sub>S<sub>3</sub> 584.0978; Found 584.0965.

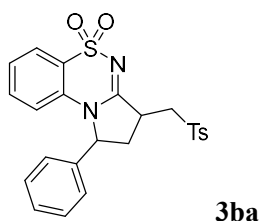

After stirring at 30 °C for 12 hours, the residue was purified by column chromatography (silica gel, EtOAc/Petroleum ether: 2/1) to afford the title compound (an inseparable mixture, 60% yield, 83 mg, dr = 1.7:1) as a white solid. The major isomer: <sup>1</sup>H NMR (400 MHz, CDCl<sub>3</sub>) δ 7.83 (d, *J* = 7.8 Hz, 1H), 7.79-7.76 (m, 1H), 7.71 (d, *J* = 8.0 Hz, 2H), 7.37 – 7.18 (m, 6H), 7.11 – 7.04 (m, 2H), 6.85 – 6.74 (m, 1H), 5.67 (d, *J* = 8.7 Hz, 1H), 3.92 – 3.80 (m, 1H), 3.78 – 3.63 (m, 1H), 3.41 – 3.22 (m, 1H), 2.88 – 2.72 (m, 1H), 2.69 – 2.56 (m, 1H), 2.40 (s, 3H). The minor isomer: <sup>1</sup>H

NMR (400 MHz, CDCl<sub>3</sub>)  $\delta$  7.79-7.76 (m, 2H), 7.37 – 7.18 (m, 9H), 6.85 – 6.74 (m, 1H), 5.52 (t,  $J$  = 8.0 Hz, 1H), 3.92 – 3.80 (m, 1H), 3.78 – 3.63 (m, 1H), 3.41 – 3.22 (m, 2H), 2.40 (s, 3H), 2.11 – 1.99 (m, 1H). <sup>13</sup>C NMR (125 MHz, CDCl<sub>3</sub>)  $\delta$  164.1, 161.7, 145.5, 139.0, 137.4, 135.9, 134.5, 133.6, 133.1, 132.7, 130.3, 130.2, 129.7, 129.6, 129.5, 128.8, 128.7, 128.2, 128.0, 127.9, 127.0, 126.7, 125.5, 125.1, 124.8, 124.44, 122.41, 122.0, 117.0, 116.8, 64.9, 63.7, 57.9, 57.0, 38.7, 37.7, 37.3, 36.1, 21.7. HRMS (ESI)  $m/z$ : [M + H]<sup>+</sup> Calcd for C<sub>24</sub>H<sub>23</sub>N<sub>2</sub>O<sub>4</sub>S<sub>2</sub> 467.1094; Found 467.1107.

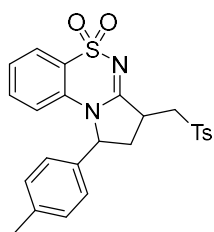

**3ca**

After stirring at 30 °C for 12 hours, the residue was purified by column chromatography (silica gel, EtOAc/Petroleum ether: 2/1) to afford the title compound (an inseparable mixture, 55% yield, 79 mg, dr = 2.1:1) as a white solid. The major isomer: <sup>1</sup>H NMR (400 MHz, CDCl<sub>3</sub>)  $\delta$  7.87 (dd,  $J$  = 7.8, 1.6 Hz, 1H), 7.73 (d,  $J$  = 8.3 Hz, 2H), 7.43 – 7.28 (m, 3H), 7.15-7.11 (m, 3H), 6.97 (d,  $J$  = 8.2 Hz, 2H), 6.83 – 6.78 (m, 1H), 5.61 (d,  $J$  = 8.4 Hz, 1H), 3.96 – 3.83 (m, 1H), 3.79 – 3.66 (m, 1H), 3.33 – 3.19 (m, 2H), 2.80 – 2.71 (m, 1H), 2.43 (s, 3H), 2.31 (s, 3H). The minor isomer: <sup>1</sup>H NMR (400 MHz, CDCl<sub>3</sub>)  $\delta$  7.83 – 7.80 (m, 1H), 7.78 (d,  $J$  = 8.3 Hz, 2H), 7.43 – 7.28 (m, 6H), 7.15-7.11 (m, 2H), 6.83 – 6.78 (m, 1H), 5.46 (dd,  $J$  = 8.8, 7.1 Hz, 1H), 3.96 – 3.83 (m, 1H), 3.79 – 3.66 (m, 1H), 2.70 – 2.61 (m, 2H), 2.43 (s, 3H), 2.30 (s, 3H), 2.11 – 2.01 (m, 1H). <sup>13</sup>C NMR (100 MHz, CDCl<sub>3</sub>)  $\delta$  164.0, 161.6, 145.5, 138.8, 138.7, 136.0, 135.9, 134.6, 134.2, 133.6, 133.1, 132.7, 130.4, 130.31, 130.26, 130.2, 129.9, 128.2, 128.0, 127.9, 126.9, 126.7, 125.4, 125.0, 124.6, 122.5, 122.1, 116.9, 116.8, 64.9, 63.6, 58.0, 57.1, 38.7, 37.6, 37.5, 36.3, 21.7, 21.2, 21.1. HRMS (ESI)  $m/z$ : [M + H]<sup>+</sup> Calcd for C<sub>25</sub>H<sub>25</sub>N<sub>2</sub>O<sub>4</sub>S<sub>2</sub> 481.1250; Found 481.1263.

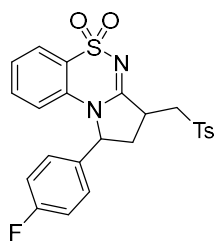

**3da**

After stirring at 30 °C for 12 hours, the residue was purified by column chromatography (silica gel, EtOAc/Petroleum ether: 2/1) to afford the title compound (an inseparable mixture, 56% yield, 81 mg, dr = 2.0:1) as a white solid. The

major isomer:  $^1\text{H}$  NMR (500 MHz,  $\text{CDCl}_3$ )  $\delta$  7.84 (dd,  $J = 7.9, 1.5$  Hz, 1H), 7.81 – 7.75 (m, 1H), 7.72 (d,  $J = 8.0$  Hz, 2H), 7.42 – 7.37 (m, 1H), 7.37 – 7.29 (m, 2H), 7.08 (dd,  $J = 8.7, 5.0$  Hz, 2H), 7.05 – 6.96 (m, 2H), 6.78 (d,  $J = 8.4$  Hz, 1H), 5.65 (d,  $J = 8.7$  Hz, 1H), 3.92 – 3.82 (m, 1H), 3.76 – 3.64 (m, 1H), 3.33 – 3.20 (m, 1H), 2.84 – 2.73 (m, 1H), 2.43 (s, 3H). The minor isomer:  $^1\text{H}$  NMR (500 MHz,  $\text{CDCl}_3$ )  $\delta$  7.81 – 7.75 (m, 1H), 7.72 (d,  $J = 8.0$  Hz, 2H), 7.37 – 7.29 (m, 6H), 7.25 – 7.19 (m, 1H), 7.05 – 6.96 (m, 2H), 6.74 (d,  $J = 8.2$  Hz, 1H), 5.54 – 5.47 (m, 1H), 3.92 – 3.82 (m, 1H), 3.76 – 3.64 (m, 1H), 3.33 – 3.20 (m, 1H), 2.68 – 2.58 (m, 2H), 2.43 (s, 3H), 2.10 – 2.00 (m, 1H).  $^{13}\text{C}$  NMR (125 MHz,  $\text{CDCl}_3$ )  $\delta$  164.0, 162.6 (d,  $J = 248.4$  Hz), 161.5, 145.6, 145.5, 135.9, 135.8, 134.8 (d,  $J = 3.3$  Hz), 134.4, 133.4, 133.1, 132.7, 130.2, 130.2, 127.9, 127.9, 127.4 (d,  $J = 8.2$  Hz), 127.0, 126.9 (d,  $J = 8.3$  Hz), 126.8, 125.0, 124.6, 122.6, 122.1, 116.8, 116.73 (d,  $J = 22.0$  Hz), 116.71 (d,  $J = 22.5$  Hz), 116.7, 64.3, 63.1, 57.8, 56.6, 38.6, 37.6, 37.5, 36.1, 21.7.  $^{19}\text{F}$  NMR (376 MHz,  $\text{CDCl}_3$ )  $\delta$  -112.16, -112.41. HRMS (ESI)  $m/z$ :  $[\text{M} + \text{H}]^+$  Calcd for  $\text{C}_{24}\text{H}_{22}\text{FN}_2\text{O}_4\text{S}_2$  485.1000; Found 485.1019.

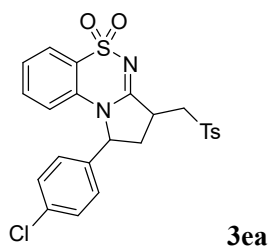

After stirring at 30 °C for 12 hours, the residue was purified by column chromatography (silica gel, EtOAc/Petroleum ether: 2/1) to afford the title compound (an inseparable mixture, 49% yield, 73 mg, dr = 3.2:1) as a white solid. The major isomer:  $^1\text{H}$  NMR (400 MHz,  $\text{CDCl}_3$ )  $\delta$  7.89 (dd,  $J = 7.8, 1.6$  Hz, 1H), 7.74 (d,  $J = 8.0$  Hz, 2H), 7.45 – 7.39 (m, 1H), 7.39 – 7.29 (m, 5H), 7.04 (d,  $J = 8.2$  Hz, 2H), 6.78 – 6.68 (m, 1H), 5.62 (d,  $J = 8.7$  Hz, 1H), 3.95 – 3.80 (m, 1H), 3.78 – 3.63 (m, 1H), 3.36 – 3.17 (m, 1H), 2.85 – 2.74 (m, 1H), 2.74 – 2.60 (m, 1H), 2.45 (s, 3H). The minor isomer:  $^1\text{H}$  NMR (400 MHz,  $\text{CDCl}_3$ )  $\delta$  7.84 (d,  $J = 7.1$  Hz, 1H), 7.79 (d,  $J = 8.0$  Hz, 2H), 7.39 – 7.29 (m, 6H), 7.18 (d,  $J = 8.1$  Hz, 2H), 6.78 – 6.68 (m, 1H), 5.48 (t,  $J = 8.0$  Hz, 1H), 3.95 – 3.80 (m, 1H), 3.78 – 3.63 (m, 1H), 3.36 – 3.17 (m, 2H), 2.45 (s, 3H), 2.13 – 1.97 (m, 1H).  $^{13}\text{C}$  NMR (125 MHz,  $\text{CDCl}_3$ )  $\delta$  164.0, 161.4, 145.6, 137.4, 135.9, 135.84, 135.76, 134.7, 134.3, 133.4, 133.2, 132.7, 130.3, 129.9, 128.0, 127.9, 127.1, 126.9, 126.2, 125.2, 124.8, 122.6, 122.2, 116.6, 116.5, 64.3, 63.1, 57.8, 57.0, 38.5, 37.5, 37.4, 36.1, 21.7. HRMS (ESI)  $m/z$ :  $[\text{M} + \text{H}]^+$  Calcd for  $\text{C}_{24}\text{H}_{22}\text{ClN}_2\text{O}_4\text{S}_2$  501.0704; Found 501.0714.

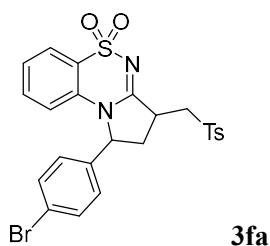

After stirring at 30 °C for 12 hours, the residue was purified by column chromatography (silica gel, EtOAc/Petroleum ether: 2/1) to afford the title compound (an inseparable mixture, 51% yield, 83 mg, dr = 1.3:1) as a white solid. The major isomer:  $^1\text{H}$  NMR (400 MHz,  $\text{CDCl}_3$ )  $\delta$  7.90 (dd,  $J$  = 7.8, 1.5 Hz, 1H), 7.75 (d,  $J$  = 8.1 Hz, 2H), 7.55 – 7.32 (m, 6H), 7.00 (d,  $J$  = 8.1 Hz, 2H), 6.81 – 6.68 (m, 1H), 5.63 (d,  $J$  = 8.6 Hz, 1H), 3.98 – 3.83 (m, 1H), 3.82 – 3.62 (m, 1H), 3.40 – 3.13 (m, 1H), 2.89 – 2.76 (m, 1H), 2.75 – 2.64 (m, 1H), 2.47 (s, 3H). The minor isomer:  $^1\text{H}$  NMR (400 MHz,  $\text{CDCl}_3$ )  $\delta$  7.88 – 7.84 (m, 1H), 7.80 (d,  $J$  = 8.0 Hz, 2H), 7.55 – 7.32 (m, 6H), 7.14 (d,  $J$  = 8.0 Hz, 2H), 6.81 – 6.68 (m, 1H), 5.49 (t,  $J$  = 8.0 Hz, 1H), 3.98 – 3.83 (m, 1H), 3.82 – 3.62 (m, 1H), 3.40 – 3.13 (m, 2H), 2.47 (s, 3H), 2.14 – 2.03 (m, 1H).  $^{13}\text{C}$  NMR (125 MHz,  $\text{CDCl}_3$ )  $\delta$  164.0, 161.4, 145.6, 138.0, 136.3, 135.9, 135.8, 134.3, 133.4, 133.2, 132.9, 132.9, 132.8, 130.3, 127.9, 127.9, 127.2, 127.1, 126.8, 125.2, 124.8, 122.8, 122.6, 122.1, 116.6, 116.5, 64.3, 63.2, 57.8, 57.0, 38.6, 37.5, 37.3, 36.0, 21.7. HRMS (ESI)  $m/z$ :  $[\text{M} + \text{H}]^+$  Calcd for  $\text{C}_{24}\text{H}_{22}\text{BrN}_2\text{O}_4\text{S}_2$  545.0199; Found 545.0186.

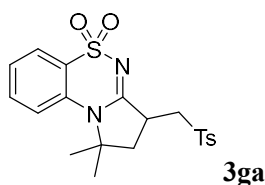

After stirring at 30 °C for 12 hours, the residue was purified by column chromatography (silica gel, EtOAc/Petroleum ether: 1/1) to afford the title compound (58% yield, 72 mg) as a white solid. mp: 241.1 °C.  $^1\text{H}$  NMR (500 MHz,  $\text{CDCl}_3$ )  $\delta$  8.00 (dd,  $J$  = 7.8, 1.6 Hz, 1H), 7.82 (d,  $J$  = 8.1 Hz, 2H), 7.64-7.60 (m, 1H), 7.47-7.43 (m, 2H), 7.40 (d,  $J$  = 8.0 Hz, 2H), 3.95 (dd,  $J$  = 14.0, 2.6 Hz, 1H), 3.76 – 3.65 (m, 1H), 3.19 (dd,  $J$  = 13.9, 11.3 Hz, 1H), 2.83 (dd,  $J$  = 13.1, 8.2 Hz, 1H), 2.47 (s, 3H), 2.14 (t,  $J$  = 12.7 Hz, 1H), 1.83 (s, 3H), 1.71 (s, 3H).  $^{13}\text{C}$  NMR (125 MHz,  $\text{CDCl}_3$ )  $\delta$  161.9, 145.5, 136.1, 133.8, 132.7, 130.2, 127.9, 126.6, 125.9, 123.0, 116.1, 67.7, 57.6, 44.3, 36.8, 28.4, 23.9, 21.7. HRMS (ESI)  $m/z$ :  $[\text{M} + \text{H}]^+$  Calcd for  $\text{C}_{20}\text{H}_{23}\text{N}_2\text{O}_4\text{S}_2$  419.1094; Found 419.1098.

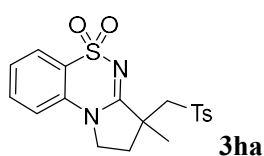

After stirring at 30 °C for 12 hours, the residue was purified by column chromatography (silica gel, EtOAc/Petroleum ether: 1/1) to afford the title compound (47% yield, 57 mg) as a white solid. mp: 194.1 °C. <sup>1</sup>H NMR (500 MHz, CDCl<sub>3</sub>) δ 7.75 (dd, *J* = 7.9, 1.5 Hz, 1H), 7.65 (d, *J* = 8.3 Hz, 2H), 7.54 – 7.46 (m, 1H), 7.30 (t, *J* = 7.7 Hz, 1H), 7.19 (d, *J* = 8.0 Hz, 2H), 7.02 (d, *J* = 8.4 Hz, 1H), 4.12 – 4.02 (m, 1H), 3.99 – 3.89 (m, 1H), 3.46 (d, *J* = 14.4 Hz, 1H), 3.38 (d, *J* = 14.3 Hz, 1H), 2.87 – 2.74 (m, 1H), 2.28 (s, 3H), 2.25 – 2.17 (m, 1H), 1.39 (s, 3H). <sup>13</sup>C NMR (125 MHz, CDCl<sub>3</sub>) δ 165.0, 145.2, 137.3, 134.4, 133.2, 130.1, 127.6, 126.8, 124.6, 121.7, 115.8, 62.2, 47.3, 46.8, 29.8, 25.1, 21.6. HRMS (ESI) *m/z*: [M + H]<sup>+</sup> Calcd for C<sub>19</sub>H<sub>21</sub>N<sub>2</sub>O<sub>4</sub>S<sub>2</sub> 405.0937; Found 405.0950.

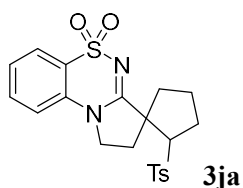

After stirring at 30 °C for 18 hours, the residue was purified by column chromatography (silica gel, EtOAc/Petroleum ether: 1/1) to afford the title compound (43% yield, 55 mg) as a white solid. mp: 230.4 °C. <sup>1</sup>H NMR (400 MHz, CDCl<sub>3</sub>) δ 8.03 (dd, *J* = 7.9, 1.5 Hz, 1H), 7.73 (d, *J* = 8.0 Hz, 2H), 7.71– 7.62 (m, 1H), 7.50 (t, *J* = 7.6 Hz, 1H), 7.29 (d, *J* = 7.6 Hz, 2H), 7.13 (d, *J* = 8.3 Hz, 1H), 4.33–4.29 (m, 1H), 4.13 – 4.07 (m, 1H), 4.04–4.00 (m, 1H), 3.41 – 3.31 (m, 1H), 2.38 (s, 3H), 2.36 – 2.25 (m, 1H), 2.24 – 2.13 (m, 2H), 2.09 – 1.88 (m, 4H). <sup>13</sup>C NMR (125 MHz, CDCl<sub>3</sub>) δ 164.8, 145.1, 136.4, 134.7, 133.0, 130.0, 128.0, 126.8, 125.1, 122.2, 115.4, 69.5, 57.0, 47.8, 41.1, 27.1, 26.4, 22.1, 21.6. HRMS (ESI) *m/z*: [M + H]<sup>+</sup> Calcd for C<sub>21</sub>H<sub>23</sub>N<sub>2</sub>O<sub>4</sub>S<sub>2</sub> 431.1094; Found 431.1104.

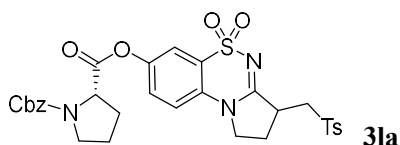

After stirring at 30 °C for 12 hours, the residue was purified by column chromatography (silica gel, EtOAc/Petroleum ether: 1/1) to afford the title compound (an inseparable mixture, 26% yield, 49 mg, dr = 1.4:1) as a white solid. The major isomer: <sup>1</sup>H NMR (400 MHz, CDCl<sub>3</sub>) δ 7.80 (d, *J* = 8.0 Hz, 2H), 7.40 – 7.27 (m, 9H), 6.93 (s, 1H), 5.31 – 4.94 (m, 2H), 4.62 – 4.44 (m, 1H), 4.15 – 4.03 (m, 1H), 3.96 – 3.86 (m, 1H), 3.85 – 3.76 (m, 1H), 3.70 – 3.49 (m, 3H), 3.33 – 3.11 (m, 1H), 2.84 – 2.70 (m, 1H), 2.45 (s, 3H), 2.41 – 2.31 (m, 1H), 2.29 – 2.13 (m, 2H), 2.11 – 1.90 (m, 2H). The minor isomer: <sup>1</sup>H NMR (400 MHz, CDCl<sub>3</sub>) δ 7.80 (d, *J* = 8.0 Hz, 1H), 7.65 (t, *J* = 2.4 Hz, 1H), 7.53 (s, 1H), 7.40 – 7.27 (m, 8H), 7.00 (d, *J* = 9.1 Hz, 1H), 5.31 – 4.94 (m, 2H), 4.62 – 4.44 (m, 1H), 4.15 – 4.03 (m, 1H), 3.96 – 3.86



(m, 1H), 3.85 – 3.76 (m, 1H), 3.70 – 3.49 (m, 3H), 3.33 – 3.11 (m, 1H), 2.84 – 2.70 (m, 1H), 2.45 (s, 3H), 2.41 – 2.31 (m, 1H), 2.29 – 2.13 (m, 2H), 2.11 – 1.90 (m, 2H). <sup>13</sup>C NMR (125 MHz, CDCl<sub>3</sub>) δ 170.9, 170.8, 161.6, 161.6, 155.0, 154.1, 148.44, 148.42, 148.2, 145.52, 145.48, 136.5, 136.3, 135.94, 135.91, 132.1, 132.0, 130.3, 128.7, 128.5, 128.3, 128.2, 128.1, 127.98, 127.97, 127.8, 127.22, 127.19, 127.0, 122.5, 122.3, 117.6, 116.8, 116.7, 67.4, 67.2, 59.4, 58.8, 57.4, 48.2, 47.1, 46.6, 39.59, 39.56, 31.02, 29.96, 25.5, 24.6, 23.7, 21.7. HRMS (ESI) m/z: [M + H]<sup>+</sup> Calcd for C<sub>31</sub>H<sub>32</sub>N<sub>3</sub>O<sub>8</sub>S<sub>2</sub> 638.1625; Found 638.1604.

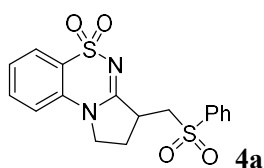

After stirring at 30 °C for 12 hours, the residue was purified by column chromatography (silica gel, EtOAc/Petroleum ether: 1/1) to afford the title compound (69% yield, 77 mg) as a white solid. mp: 220.8 °C. <sup>1</sup>H NMR (400 MHz, CDCl<sub>3</sub>) δ 8.04 – 7.92 (m, 3H), 7.74 (t, *J* = 7.5 Hz, 1H), 7.70 – 7.61 (m, 3H), 7.49 (t, *J* = 7.7 Hz, 1H), 7.11 (d, *J* = 8.4 Hz, 1H), 4.23 (t, *J* = 9.6 Hz, 1H), 4.08-4.01 (m, 1H), 3.97-3.92 (m, 1H), 3.79 – 3.69 (m, 1H), 3.29 (dd, *J* = 14.0, 11.2 Hz, 1H), 3.01 – 2.89 (m, 1H), 2.43 – 2.30 (m, 1H). <sup>13</sup>C NMR (125 MHz, CDCl<sub>3</sub>) δ 161.4, 139.0, 134.4, 133.3, 129.7, 128.0, 127.0, 125.3, 122.0, 115.1, 57.4, 48.3, 39.5, 25.8. HRMS (ESI) m/z: [M + H]<sup>+</sup> Calcd for C<sub>17</sub>H<sub>17</sub>N<sub>2</sub>O<sub>4</sub>S<sub>2</sub> 377.0624; Found 377.0633.

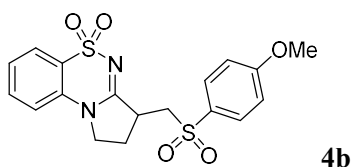

After stirring at 30 °C for 18 hours, the residue was purified by column chromatography (silica gel, EtOAc/Petroleum ether: 1/1) to afford the title compound (58% yield, 70 mg) as a white solid. mp: 208.3 °C. <sup>1</sup>H NMR (500 MHz, CDCl<sub>3</sub>) δ 7.91 (dd, *J* = 7.9, 1.4 Hz, 1H), 7.87 (d, *J* = 8.9 Hz, 2H), 7.63 (t, *J* = 7.9 Hz, 1H), 7.44 (t, *J* = 7.6 Hz, 1H), 7.12 – 7.03 (m, 3H), 4.20-4.12 (m, 1H), 4.03-3.98 (m, 1H), 3.91 (s, 3H), 3.86 (dd, *J* = 14.0, 2.6 Hz, 1H), 3.71 – 3.61 (m, 1H), 3.24 (dd, *J* = 14.1, 11.1 Hz, 1H), 2.90 – 2.81 (m, 1H), 2.36 – 2.25 (m, 1H). <sup>13</sup>C NMR (125 MHz, CDCl<sub>3</sub>) δ 164.2, 161.6, 134.4, 133.3, 130.4, 130.2, 127.0, 125.1, 121.9, 115.2, 114.8, 57.7, 55.8, 48.3, 39.7, 25.7. HRMS (ESI) m/z: [M + H]<sup>+</sup> Calcd for C<sub>18</sub>H<sub>19</sub>N<sub>2</sub>O<sub>5</sub>S<sub>2</sub> 407.0730; Found 407.0731.

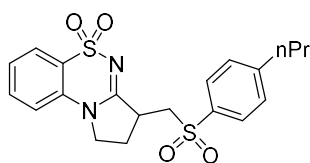

**4c**

After stirring at 30 °C for 12 hours, the residue was purified by column chromatography (silica gel, EtOAc/Petroleum ether: 1/1) to afford the title compound (66% yield, 82 mg) as a white solid. mp: 217.3 °C. <sup>1</sup>H NMR (500 MHz, CDCl<sub>3</sub>) δ 7.94 (dd, *J* = 7.9, 1.4 Hz, 1H), 7.86 (d, *J* = 8.3 Hz, 2H), 7.66 – 7.62 (m, 1H), 7.48 – 7.43 (m, 1H), 7.41 (d, *J* = 8.4 Hz, 2H), 7.09 (dd, *J* = 8.4, 1.0 Hz, 1H), 4.22-4.18 (m, 1H), 4.04-3.99 (m, 1H), 3.89 (dd, *J* = 14.0, 2.6 Hz, 1H), 3.72-3.66 (m, 1H), 3.32 – 3.14 (m, 1H), 2.97 – 2.83 (m, 1H), 2.70 (t, *J* = 7.8 Hz, 2H), 2.40 – 2.23 (m, 1H), 1.76 – 1.65 (m, 2H), 0.98 (t, *J* = 7.4 Hz, 3H). <sup>13</sup>C NMR (125 MHz, CDCl<sub>3</sub>) δ 161.5, 150.1, 136.2, 134.4, 133.3, 129.7, 128.0, 127.0, 125.2, 122.0, 115.1, 57.5, 48.3, 39.6, 38.0, 25.8, 24.2, 13.7. HRMS (ESI) *m/z*: [M + H]<sup>+</sup> Calcd for C<sub>20</sub>H<sub>23</sub>N<sub>2</sub>O<sub>4</sub>S<sub>2</sub> 419.1094; Found 419.1099.

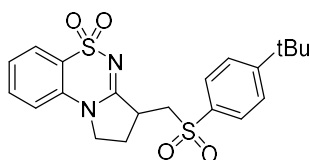

**4d**

After stirring at 30 °C for 12 hours, the residue was purified by column chromatography (silica gel, EtOAc/Petroleum ether: 1/1) to afford the title compound (67% yield, 86 mg) as a white solid. mp: 236.8 °C. <sup>1</sup>H NMR (400 MHz, CDCl<sub>3</sub>) δ 7.93 (d, *J* = 7.9 Hz, 1H), 7.86 (d, *J* = 8.3 Hz, 2H), 7.68 – 7.56 (m, 3H), 7.44 (t, *J* = 7.7 Hz, 1H), 7.07 (d, *J* = 8.3 Hz, 1H), 4.19 (t, *J* = 9.5 Hz, 1H), 4.04-3.97 (m, 1H), 3.91 – 3.82 (m, 1H), 3.72 – 3.61 (m, 1H), 3.22 (dd, *J* = 14.0, 11.3 Hz, 1H), 2.92 (dt, *J* = 14.7, 7.9 Hz, 1H), 2.42 – 2.27 (m, 1H), 1.36 (s, 9H). <sup>13</sup>C NMR (125 MHz, CDCl<sub>3</sub>) δ 161.5, 158.5, 135.8, 134.4, 133.3, 127.8, 127.0, 126.7, 125.2, 122.0, 115.1, 57.5, 48.3, 39.6, 35.4, 31.1, 25.8. HRMS (ESI) *m/z*: [M + H]<sup>+</sup> Calcd for C<sub>21</sub>H<sub>25</sub>N<sub>2</sub>O<sub>4</sub>S<sub>2</sub> 433.1250; Found 433.1243.

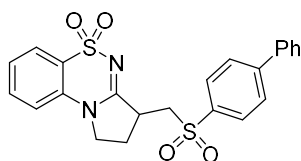

**4e**

After stirring at 30 °C for 12 hours, the residue was purified by column chromatography (silica gel, EtOAc/Petroleum ether: 1/1) to afford the title compound (51% yield, 69 mg) as a white solid. mp: 225.1 °C. <sup>1</sup>H NMR (400 MHz, CDCl<sub>3</sub>) δ 8.03 (d, *J* = 7.8 Hz, 2H), 7.92 (d, *J* = 7.9 Hz, 1H), 7.82 (d, *J* = 8.1 Hz, 2H), 7.67 – 7.62 (m, 3H), 7.56 – 7.41 (m, 4H), 7.10 (d, *J* = 8.4 Hz, 1H), 4.21 (t, *J* = 9.7 Hz, 1H), 4.08 – 3.98 (m, 1H), 3.95 (dd, *J* = 14.1, 2.5 Hz, 1H), 3.79

– 3.66 (m, 1H), 3.32 (dd,  $J = 14.0, 11.2$  Hz, 1H), 3.01 – 2.84 (m, 1H), 2.43 – 2.26 (m, 1H).  $^{13}\text{C}$  NMR (125 MHz,  $\text{CDCl}_3$ )  $\delta$  161.5, 147.3, 139.0, 137.3, 134.4, 133.3, 129.2, 128.8, 128.5, 128.3, 127.5, 127.0, 125.2, 121.9, 115.1, 57.5, 48.3, 39.6, 25.7. HRMS (ESI)  $m/z$ :  $[\text{M} + \text{H}]^+$  Calcd for  $\text{C}_{23}\text{H}_{21}\text{N}_2\text{O}_4\text{S}_2$  453.0937; Found 453.0933.

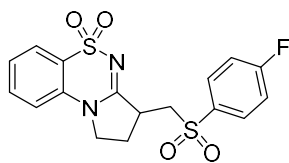

**4f**

After stirring at 30 °C for 12 hours, the residue was purified by column chromatography (silica gel, EtOAc/Petroleum ether: 1/1) to afford the title compound (58% yield, 68 mg) as a white solid. mp: 227.8 °C.  $^1\text{H}$  NMR (400 MHz,  $\text{CDCl}_3$ )  $\delta$  8.10 – 7.94 (m, 3H), 7.75 – 7.68 (m, 1H), 7.52 (t,  $J = 7.7$  Hz, 1H), 7.38 – 7.31 (m, 2H), 7.13 (d,  $J = 8.3$  Hz, 1H), 4.32 – 4.20 (m, 1H), 4.10–4.03 (m, 1H), 3.96 (dd,  $J = 14.0, 2.7$  Hz, 1H), 3.85 – 3.72 (m, 1H), 3.30 (dd,  $J = 14.0, 11.0$  Hz, 1H), 3.07 – 2.91 (m, 1H), 2.47 – 2.30 (m, 1H).  $^{13}\text{C}$  NMR (125 MHz, DMSO)  $\delta$  165.8 (d,  $J = 253.5$  Hz), 162.6, 135.6 (d,  $J = 3.0$  Hz), 134.9, 133.9, 131.7 (d,  $J = 10.0$  Hz), 127.1, 124.5, 121.8, 117.4 (d,  $J = 22.7$  Hz), 116.9, 57.0, 48.9, 39.9, 25.3.  $^{19}\text{F}$  NMR (376 MHz,  $\text{CDCl}_3$ )  $\delta$  -101.99. HRMS (ESI)  $m/z$ :  $[\text{M} + \text{H}]^+$  Calcd for  $\text{C}_{17}\text{H}_{16}\text{FN}_2\text{O}_4\text{S}_2$  399.0530; Found 399.0542.

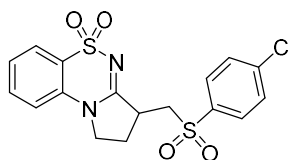

**4g**

After stirring at 30 °C for 12 hours, the residue was purified by column chromatography (silica gel, EtOAc/Petroleum ether: 1/1) to afford the title compound (67% yield, 82 mg) as a white solid. mp: 211.7 °C.  $^1\text{H}$  NMR (400 MHz,  $\text{CDCl}_3$ )  $\delta$  8.02 (d,  $J = 8.0$  Hz, 1H), 7.94 (d,  $J = 8.5$  Hz, 2H), 7.70 (t,  $J = 8.1$  Hz, 1H), 7.63 (d,  $J = 8.5$  Hz, 2H), 7.52 (t,  $J = 7.7$  Hz, 1H), 7.12 (d,  $J = 8.3$  Hz, 1H), 4.25 (t,  $J = 9.6$  Hz, 1H), 4.06 (td,  $J = 9.9, 7.1$  Hz, 1H), 4.09–3.94 (m, 1H), 3.82 – 3.71 (m, 1H), 3.30 (dd,  $J = 14.0, 11.0$  Hz, 1H), 3.03 – 2.91 (m, 1H), 2.51 – 2.24 (m, 1H).  $^{13}\text{C}$  NMR (125 MHz,  $\text{CDCl}_3$ )  $\delta$  161.2, 141.3, 137.4, 134.3, 133.3, 130.0, 129.5, 127.1, 125.4, 122.1, 115.0, 57.5, 48.2, 39.4, 25.8. HRMS (ESI)  $m/z$ :  $[\text{M} + \text{H}]^+$  Calcd for  $\text{C}_{17}\text{H}_{16}\text{ClN}_2\text{O}_4\text{S}_2$  411.0235; Found 411.0240.

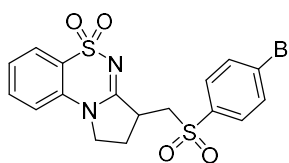

**4h**

After stirring at 30 °C for 12 hours, the residue was purified by column chromatography (silica gel, EtOAc/Petroleum ether: 1/1) to afford the title compound (57% yield, 77 mg) as a white solid. mp: 219.4 °C. <sup>1</sup>H NMR (400 MHz, CDCl<sub>3</sub>) δ 7.83-7.81 (m, 3H), 7.74 (d, *J* = 8.4 Hz, 2H), 7.60 (t, *J* = 7.8 Hz, 1H), 7.39 (t, *J* = 7.7 Hz, 1H), 7.05 (d, *J* = 8.4 Hz, 1H), 4.18-4.12 (m, 1H), 4.04-3.97 (m, 1H), 3.85 (dd, *J* = 14.1, 2.5 Hz, 1H), 3.74 – 3.61 (m, 1H), 3.28 (dd, *J* = 14.1, 11.0 Hz, 1H), 2.83-2.76 (m, 1H), 2.33 – 2.17 (m, 1H). <sup>13</sup>C NMR (125 MHz, CDCl<sub>3</sub>) δ 161.4, 137.9, 134.3, 133.2, 132.0, 129.7, 129.6, 126.9, 124.9, 121.7, 115.3, 57.4, 48.3, 39.5, 25.6. HRMS (ESI) *m/z*: [M + H]<sup>+</sup> Calcd for C<sub>17</sub>H<sub>16</sub>BrN<sub>2</sub>O<sub>4</sub>S<sub>2</sub> 454.9729; Found 454.9744.

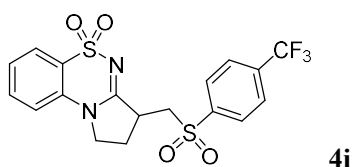

After stirring at 30 °C for 12 hours, the residue was purified by column chromatography (silica gel, EtOAc/Petroleum ether: 1/1) to afford the title compound (58% yield, 77 mg) as a white solid. mp: 217.9 °C. <sup>1</sup>H NMR (400 MHz, CDCl<sub>3</sub>) δ 8.12 (d, *J* = 8.1 Hz, 2H), 7.94 – 7.83 (m, 3H), 7.63 (t, *J* = 7.9 Hz, 1H), 7.43 (t, *J* = 7.7 Hz, 1H), 7.07 (d, *J* = 8.4 Hz, 1H), 4.24 – 4.13 (m, 1H), 4.09 – 3.99 (m, 1H), 3.93 (dd, *J* = 14.0, 2.6 Hz, 1H), 3.80 – 3.67 (m, 1H), 3.31 (dd, *J* = 14.0, 10.9 Hz, 1H), 2.96 – 2.85 (m, 1H), 2.41 – 2.25 (m, 1H). <sup>13</sup>C NMR (125 MHz, CDCl<sub>3</sub>) δ 161.1, 142.5, 136.0 (q, *J* = 33.2 Hz), 134.3, 128.7, 127.1, 126.8 (q, *J* = 3.6 Hz), 125.2, 123.0 (q, *J* = 275.7 Hz), 121.9, 115.1, 57.4, 48.3, 39.3, 25.7. <sup>19</sup>F NMR (376 MHz, CDCl<sub>3</sub>) δ -63.25. HRMS (ESI) *m/z*: [M + H]<sup>+</sup> Calcd for C<sub>18</sub>H<sub>16</sub>F<sub>3</sub>N<sub>2</sub>O<sub>4</sub>S<sub>2</sub> 445.0498; Found 445.0510.

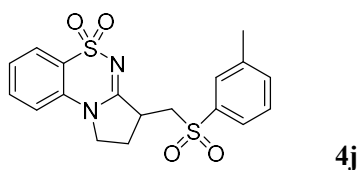

After stirring at 30 °C for 12 hours, the residue was purified by column chromatography (silica gel, EtOAc/Petroleum ether: 1/1) to afford the title compound (70% yield, 81 mg) as a white solid. mp: 243.4 °C. <sup>1</sup>H NMR (400 MHz, CDCl<sub>3</sub>) δ 8.01 (dd, *J* = 7.9, 1.5 Hz, 1H), 7.80 – 7.75 (m, 2H), 7.71 – 7.64 (m, 1H), 7.54 – 7.47 (m, 3H), 7.15 – 7.06 (m, 1H), 4.26-4.20 (m, 1H), 4.07-4.01 (m, 1H), 3.94 (dd, *J* = 14.0, 2.6 Hz, 1H), 3.80 – 3.62 (m, 1H), 3.26 (dd, *J* = 14.0, 11.2 Hz, 1H), 3.05 – 2.82 (m, 1H), 2.50 (s, 3H), 2.45 – 2.29 (m, 1H). <sup>13</sup>C NMR (125 MHz, CDCl<sub>3</sub>) δ 161.4, 140.1, 138.8, 135.2, 134.4, 133.3, 129.5, 128.2, 127.1, 125.4, 125.0, 122.1, 114.9, 57.4, 48.3, 39.5, 25.8, 21.4. HRMS (ESI) *m/z*: [M + H]<sup>+</sup> Calcd for C<sub>18</sub>H<sub>19</sub>N<sub>2</sub>O<sub>4</sub>S<sub>2</sub> 391.0781; Found 391.0776.

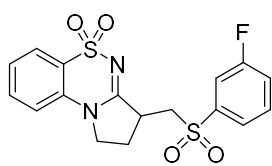

**4k**

After stirring at 30 °C for 12 hours, the residue was purified by column chromatography (silica gel, EtOAc/Petroleum ether: 1/1) to afford the title compound (56% yield, 66 mg) as a white solid. mp: 236.1 °C. <sup>1</sup>H NMR (400 MHz, CDCl<sub>3</sub>) δ 8.03 (dd, *J* = 7.9, 1.4 Hz, 1H), 7.81 (d, *J* = 7.8 Hz, 1H), 7.74 – 7.62 (m, 3H), 7.53 (t, *J* = 7.7 Hz, 1H), 7.49 – 7.42 (m, 1H), 7.13 (d, *J* = 8.3 Hz, 1H), 4.36 – 4.21 (m, 1H), 4.12 – 4.03 (m, 1H), 3.99 (dd, *J* = 13.9, 2.7 Hz, 1H), 3.81-3.74 (m, 1H), 3.31 (dd, *J* = 14.0, 11.2 Hz, 1H), 3.07 – 2.91 (m, 1H), 2.47 – 2.31 (m, 1H). <sup>13</sup>C NMR (125 MHz, DMSO) δ 162.5, 162.4 (d, *J* = 249.5 Hz), 141.3 (d, *J* = 6.7 Hz), 134.9, 133.9, 132.6 (d, *J* = 7.9 Hz), 127.1, 124.6 (d, *J* = 3.1 Hz), 124.5, 122.0 (d, *J* = 21.2 Hz), 121.8, 116.9, 115.6 (d, *J* = 24.5 Hz), 56.7, 48.9, 39.8, 25.3. <sup>19</sup>F NMR (376 MHz, CDCl<sub>3</sub>) δ -108.12. HRMS (ESI) *m/z*: [M + H]<sup>+</sup> Calcd for C<sub>17</sub>H<sub>16</sub>FN<sub>2</sub>O<sub>4</sub>S<sub>2</sub> 395.0530; Found 395.0540.

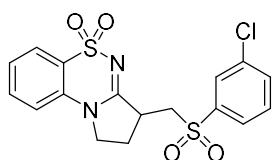

**4l**

After stirring at 30 °C for 12 hours, the residue was purified by column chromatography (silica gel, EtOAc/Petroleum ether: 1/1) to afford the title compound (67% yield, 82 mg) as a white solid. mp: 211.9 °C. <sup>1</sup>H NMR (400 MHz, CDCl<sub>3</sub>) δ 7.98 (dd, *J* = 5.6, 2.8 Hz, 2H), 7.89 (d, *J* = 7.8 Hz, 1H), 7.74 – 7.65 (m, 2H), 7.60 (t, *J* = 7.9 Hz, 1H), 7.50 (t, *J* = 7.7 Hz, 1H), 7.12 (d, *J* = 8.4 Hz, 1H), 4.24 (t, *J* = 9.6 Hz, 1H), 4.10-4.03 (m, 1H), 3.98-3.93 (m, 1H), 3.85 – 3.69 (m, 1H), 3.30 (dd, *J* = 14.0, 11.1 Hz, 1H), 3.04 – 2.87 (m, 1H), 2.45 – 2.27 (m, 1H). <sup>13</sup>C NMR (125 MHz, CDCl<sub>3</sub>) δ 161.1, 140.7, 135.9, 134.6, 134.3, 133.3, 131.1, 128.1, 127.1, 126.1, 125.3, 122.0, 115.0, 57.5, 48.3, 39.4, 25.8. HRMS (ESI) *m/z*: [M + H]<sup>+</sup> Calcd for C<sub>17</sub>H<sub>16</sub>ClN<sub>2</sub>O<sub>4</sub>S<sub>2</sub> 411.0235; Found 411.0248.

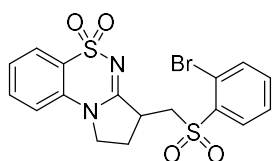

**4m**

After stirring at 30 °C for 12 hours, the residue was purified by column chromatography (silica gel, EtOAc/Petroleum ether: 1/1) to afford the title compound (62% yield, 84 mg) as a white solid. mp: 223.2 °C. <sup>1</sup>H NMR (400 MHz, CDCl<sub>3</sub>) δ 8.21 (dd, *J* = 7.5, 2.0 Hz, 1H), 8.10 – 7.96 (m, 1H), 7.94 – 7.80 (m, 1H), 7.75 – 7.65 (m, 1H), 7.62 – 7.55 (m, 2H), 7.55 – 7.49 (m, 1H), 7.12 (d, *J* = 8.4 Hz, 1H), 4.32 – 4.18 (m, 2H), 4.08-4.10 (m, 1H), 3.91 – 3.79 (m, 1H), 3.66 (dd,

$J = 13.9, 11.2$  Hz, 1H), 3.02 – 2.88 (m, 1H), 2.48 – 2.32 (m, 1H).  $^{13}\text{C}$  NMR (125 MHz,  $\text{CDCl}_3$ )  $\delta$  161.2, 138.4, 135.81, 135.3, 134.4, 133.3, 131.7, 128.3, 127.1, 125.3, 122.1, 121.1, 115.0, 55.4, 48.2, 39.4, 25.9. HRMS (ESI)  $m/z$ :  $[\text{M} + \text{H}]^+$  Calcd for  $\text{C}_{17}\text{H}_{16}\text{BrN}_2\text{O}_4\text{S}_2$  454.9729; Found 454.9721.

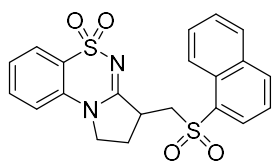

**4n**

After stirring at 30 °C for 18 hours, the residue was purified by column chromatography (silica gel, EtOAc/Petroleum ether: 1/1) to afford the title compound (55% yield, 70 mg) as a white solid. mp: 239.7 °C.  $^1\text{H}$  NMR (400 MHz,  $\text{CDCl}_3$ )  $\delta$  8.58 (s, 1H), 8.08 (dd,  $J = 13.5, 8.3$  Hz, 2H), 8.00 (d,  $J = 8.0$  Hz, 2H), 7.95 (dd,  $J = 8.8, 1.9$  Hz, 1H), 7.78 – 7.62 (m, 3H), 7.50 (t,  $J = 7.7$  Hz, 1H), 7.11 (d,  $J = 8.4$  Hz, 1H), 4.25 (t,  $J = 9.6$  Hz, 1H), 4.11 – 3.98 (m, 2H), 3.89 – 3.68 (m, 1H), 3.37 (dd,  $J = 14.1, 11.2$  Hz, 1H), 3.09 – 2.95 (m, 1H), 2.50 – 2.34 (m, 1H).  $^{13}\text{C}$  NMR (125 MHz,  $\text{CDCl}_3$ )  $\delta$  161.4, 135.8, 135.6, 134.4, 133.3, 132.2, 130.1, 130.0, 129.7, 129.5, 128.1, 128.0, 127.1, 125.3, 122.1, 122.0, 115.0, 57.4, 48.3, 39.6, 25.8. HRMS (ESI)  $m/z$ :  $[\text{M} + \text{H}]^+$  Calcd for  $\text{C}_{21}\text{H}_{19}\text{N}_2\text{O}_4\text{S}_2$  427.0781; Found 427.0794.

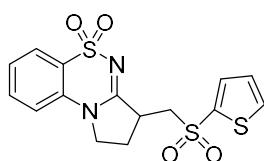

**4o**

After stirring at 30 °C for 12 hours, the residue was purified by column chromatography (silica gel, EtOAc/Petroleum ether: 1/1) to afford the title compound (56% yield, 64 mg) as a white solid. mp: 232.6 °C.  $^1\text{H}$  NMR (400 MHz,  $\text{CDCl}_3$ )  $\delta$  8.01 (d,  $J = 7.9$  Hz, 1H), 7.83-7.81 (m, 2H), 7.70 (t,  $J = 7.6$  Hz, 1H), 7.51 (t,  $J = 7.7$  Hz, 1H), 7.25 (t,  $J = 4.4$  Hz, 1H), 7.12 (d,  $J = 8.4$  Hz, 1H), 4.24 (t,  $J = 9.5$  Hz, 1H), 4.15 – 3.97 (m, 2H), 3.86 – 3.69 (m, 1H), 3.45-3.38 (m, 1H), 2.99-2.93 (m, 1H), 2.44 – 2.31 (m, 1H).  $^{13}\text{C}$  NMR (125 MHz,  $\text{CDCl}_3$ )  $\delta$  161.1, 139.7, 134.9, 134.7, 134.3, 133.3, 128.4, 127.1, 125.4, 122.1, 115.0, 59.0, 48.2, 39.8, 25.8. HRMS (ESI)  $m/z$ :  $[\text{M} + \text{H}]^+$  Calcd for  $\text{C}_{15}\text{H}_{15}\text{N}_2\text{O}_4\text{S}_3$  383.0188; Found 383.0194.

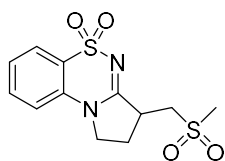

**4p**

After stirring at 30 °C for 12 hours, the residue was purified by column chromatography (silica gel, EtOAc/Petroleum ether: 1/1) to afford the title compound (63% yield, 59 mg) as a white solid. mp: 209.7 °C. <sup>1</sup>H NMR (500 MHz, CDCl<sub>3</sub>) δ 7.95 (d, *J* = 7.9 Hz, 1H), 7.71 – 7.64 (m, 1H), 7.48 (t, *J* = 7.7 Hz, 1H), 7.11 (d, *J* = 8.3 Hz, 1H), 4.22 (t, *J* = 9.5 Hz, 1H), 4.09-4.04 (m, 1H), 3.94 (dd, *J* = 13.8, 2.8 Hz, 1H), 3.89 – 3.78 (m, 1H), 3.26 (dd, *J* = 13.9, 10.4 Hz, 1H), 3.10 (s, 3H), 2.96 – 2.85 (m, 1H), 2.37 – 2.23 (m, 1H). <sup>13</sup>C NMR (125 MHz, CDCl<sub>3</sub>) δ 161.5, 134.4, 133.3, 127.1, 125.2, 121.9, 115.1, 55.5, 48.3, 42.5, 39.1, 25.9. HRMS (ESI) *m/z*: [M + H]<sup>+</sup> Calcd for C<sub>12</sub>H<sub>15</sub>N<sub>2</sub>O<sub>4</sub>S<sub>2</sub> 315.0468; Found 315.0472

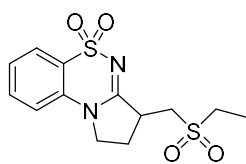

**4q**

After stirring at 30 °C for 12 hours, the residue was purified by column chromatography (silica gel, EtOAc/Petroleum ether: 1/1) to afford the title compound (67% yield, 66 mg) as a white solid. mp: 218.9 °C. <sup>1</sup>H NMR (500 MHz, CDCl<sub>3</sub>) δ 7.97 (d, *J* = 8.0 Hz, 1H), 7.68 (t, *J* = 7.9 Hz, 1H), 7.48 (t, *J* = 7.7 Hz, 1H), 7.11 (d, *J* = 8.3 Hz, 1H), 4.24-4.19 (m, 1H), 4.08-4.03 (m, 1H), 3.91 – 3.74 (m, 2H), 3.24 – 3.10 (m, 3H), 2.98 – 2.87 (m, 1H), 2.37 – 2.22 (m, 1H), 1.48 (t, *J* = 7.5 Hz, 3H). <sup>13</sup>C NMR (125 MHz, CDCl<sub>3</sub>) δ 161.7, 134.4, 133.3, 127.1, 125.2, 122.0, 115.1, 52.7, 49.1, 48.3, 38.8, 26.0, 6.8. HRMS (ESI) *m/z*: [M + H]<sup>+</sup> Calcd for C<sub>13</sub>H<sub>17</sub>N<sub>2</sub>O<sub>4</sub>S<sub>2</sub> 329.0624; Found 329.0602.

## V. Scale-up Reaction and Synthetic Transformations

### 1) Scale-up Reaction for Preparation of Product 3aa

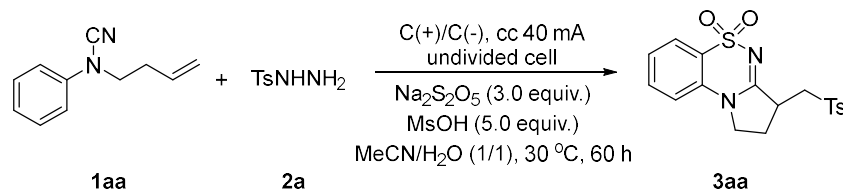

In an undivided cell (250 mL) equipped with a stir bar, a mixture of *N*-aryl cyanamides **1** (4.6 mmol, 0.791 g), TsNHNH<sub>2</sub> **2a** (13.8 mmol, 3 equiv.), Na<sub>2</sub>S<sub>2</sub>O<sub>5</sub> (13.8 mmol, 3 equiv.), MeSO<sub>3</sub>H (23 mmol) and MeCN/H<sub>2</sub>O (v/v = 1/1, 112 mL) were added. The cell was equipped with graphite plate anode (15×15×0.2 cm), and graphite plate cathode (15×15×0.2 cm), then connected to a DC regulated power supply. The reaction mixture was stirred and electrolyzed at a constant current of 40 mA at 30 °C for 60 h. When the reaction was finished, the mixture was extracted with EtOAc. The combined organic layer was washed with brine, dried over Na<sub>2</sub>SO<sub>4</sub>, filtered, and concentrated in vacuo. The residue was purified by column chromatography (silica gel, EtOAc/Petroleum ether) to provide the desired products **3aa** (57% yield, 1.02 g).

### 2) Synthetic Transformations

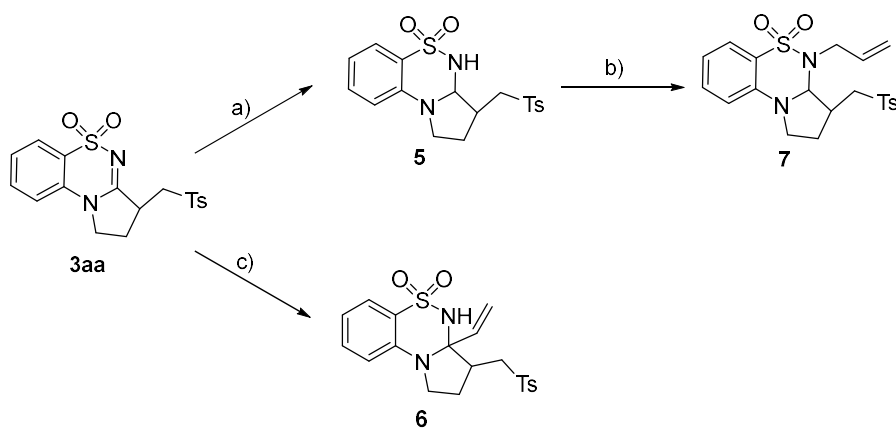

Reaction conditions: (a) DIBAL-H, toluene, reflux 10 h; (b) Allyl bromide, NaH, THF, 60 °C, 12 h; (c) Vinylmagnesium bromide, THF, rt, overnight

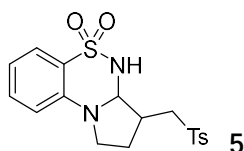

To solution of (0.2 mmol) in THF in a dried tube was added DIBAL-H (1.3 equiv.) dropwise at rt, then the reaction mixture was warmed to reflux and allowed to proceed for 10 h. The resulting mixture was cooled to rt and



quenched by addition the solution of ammonium chloride (aq.). The aqueous layer was extracted with EtOAc. The combined organic layers were dried over anhydrous Na<sub>2</sub>SO<sub>4</sub> and the solvent was evaporated under reduced pressure. The crude product was purified by chromatography on a silica gel column (EtOAc/petroleum ether = 1/2) to afford a white solid **5** (65 mg, 83%, dr = 4.0/1, an inseparable mixture). The major isomer: <sup>1</sup>H NMR (400 MHz, CDCl<sub>3</sub>) δ 7.85 (d, *J* = 8.2 Hz, 2H), 7.68 (d, *J* = 7.9 Hz, 1H), 7.47 – 7.38 (m, 3H), 6.84 (t, *J* = 7.6 Hz, 1H), 6.61 (d, *J* = 8.5 Hz, 1H), 4.83 (dd, *J* = 13.2, 9.2 Hz, 1H), 4.18 (d, *J* = 13.2 Hz, 1H), 3.66 – 3.52 (m, 2H), 3.45 (q, *J* = 9.2 Hz, 1H), 3.18 (dd, *J* = 13.9, 10.8 Hz, 1H), 2.80 (dt, *J* = 13.5, 6.9 Hz, 1H), 2.70 – 2.61 (m, 1H), 2.50 (s, 3H), 2.09 – 1.94 (m, 1H). The minor isomer: <sup>1</sup>H NMR (400 MHz, CDCl<sub>3</sub>) δ 7.85 (d, *J* = 8.2 Hz, 2H), 7.68 (d, *J* = 7.9 Hz, 1H), 7.47 – 7.38 (m, 3H), 6.88 (t, *J* = 7.4 Hz, 1H), 6.68 (d, *J* = 8.4 Hz, 1H), 5.22 – 5.17 (m, 1H), 4.36 (d, *J* = 13.4 Hz, 1H), 3.66 – 3.52 (m, 2H), 3.45 (q, *J* = 9.2 Hz, 1H), 3.15 – 3.07 (m, 1H), 2.50 (s, 3H), 2.40 – 2.33 (m, 1H), 2.29 – 2.19 (m, 1H), 2.09 – 1.94 (m, 1H). <sup>13</sup>C NMR (100 MHz, DMSO) δ 145.14, 145.08, 142.7, 141.9, 136.9, 134.1, 133.8, 130.5, 128.23, 128.15, 124.5, 124.4, 122.7, 120.6, 117.1, 116.1, 115.6, 113.8, 74.1, 71.7, 56.7, 54.9, 47.7, 46.2, 38.6, 36.0, 28.5, 27.6, 21.6. HRMS (ESI) *m/z*: [M + H]<sup>+</sup> Calcd for C<sub>18</sub>H<sub>21</sub>N<sub>2</sub>O<sub>4</sub>S<sub>2</sub> 393.0937; Found 393.0945.

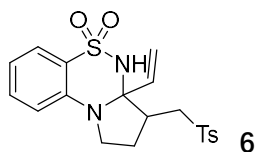

To solution of **3aa** (0.2 mmol) in THF in a dried tube was added vinylmagnesium bromide (1.3 equiv., 1 M in THF) at 0 °C, Then, the mixture was stirred at rt for overnight. Upon completion, the reaction was quenched with saturated ammonium chloride solution (aq.) and the mixture was extracted with DCM. The combined organic phases were washed with brine, dried over anhydrous Na<sub>2</sub>SO<sub>4</sub>. The organic layer was then concentrated under vacuum. The crude product was purified by chromatography on a silica gel column (EtOAc/petroleum ether = 1/3) to afford product **6** as a yellow solid. (59 mg, 71%, dr = 7/1, an inseparable mixture). The major isomer: <sup>1</sup>H NMR (400 MHz, CDCl<sub>3</sub>) δ 7.74 (d, *J* = 8.3 Hz, 2H), 7.52 (dd, *J* = 7.9, 1.5 Hz, 1H), 7.35 – 7.30 (m, 3H), 6.79 – 6.66 (m, 1H), 6.56 (d, *J* = 8.4 Hz, 1H), 5.69 (dd, *J* = 17.0, 10.3 Hz, 1H), 5.22 (d, *J* = 10.3 Hz, 1H), 4.88 (d, *J* = 16.9 Hz, 1H), 4.81 (s, 1H), 3.57 (t, *J* = 9.2 Hz, 1H), 3.44 – 3.31 (m, 2H), 2.90 (dd, *J* = 13.7, 11.2 Hz, 1H), 2.65 – 2.52 (m, 2H), 2.40 (s, 3H), 1.94 – 1.73 (m, 1H). The minor isomer: <sup>1</sup>H NMR (400 MHz, CDCl<sub>3</sub>) δ 7.68 – 7.64 (m, 2H), 7.62 – 7.58 (m, 1H), 7.35-7.29 (m, 3H), 6.79 – 6.75 (m, 1H), 6.65 (d, *J* = 8.5 Hz, 1H), 5.94 (dd, *J* = 16.9, 10.1 Hz, 1H), 5.11 – 5.00 (m, 2H), 4.69 (s, 1H), 3.57 (t, *J* = 9.2 Hz, 1H), 3.44 – 3.31 (m, 2H), 2.65 – 2.52 (m, 1H), 2.35 (s, 3H), 2.28 – 2.20 (m, 2H), 1.94 – 1.73 (m, 1H). <sup>13</sup>C NMR (100 MHz, DMSO) δ 144.4, 139.1, 135.1, 133.2, 132.8, 129.3, 128.7, 126.7, 125.4, 124.1, 120.1,

118.4, 116.1, 112.2, 79.8, 54.9, 45.3, 44.0, 30.4, 29.2, 24.6, 21.7, 20.7, 13.1. HRMS (ESI)  $m/z$ :  $[M + H]^+$  Calcd for  $C_{20}H_{23}N_2O_4S_2$  419.1094; Found 419.1098.

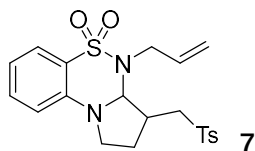

To a solution of a solution of **5** (0.10 mmol) and NaH (1.3 equiv.) in dry THF (2 mL), was added allyl bromide (1.2 equiv.). The resulting mixture was heated to 60 °C and allowed to proceed for 12 h. The resulting mixture was cooled to rt and quenched by dropwise addition the solution of ammonium chloride (aq). The aqueous layer was extracted with EtOAc. The combined organic layers were dried over anhydrous  $Na_2SO_4$  and the solvent was evaporated under reduced pressure. The crude product was purified by chromatography on a silica gel column (EtOAc/petroleum ether = 1/4) to afford an inseparable mixture as white solid (29 mg, 68%, dr = 4.3/1). The major isomer:  $^1H$  NMR (400 MHz,  $CDCl_3$ )  $\delta$  7.84 (d,  $J$  = 8.2 Hz, 2H), 7.70 (dd,  $J$  = 7.9, 1.6 Hz, 1H), 7.48 – 7.40 (m, 3H), 6.85 (t,  $J$  = 7.6 Hz, 1H), 6.62 (d,  $J$  = 8.4 Hz, 1H), 5.77 – 5.63 (m, 1H), 5.35 – 5.19 (m, 2H), 5.11 (d,  $J$  = 10.2 Hz, 1H), 3.72 (dd,  $J$  = 16.8, 5.1 Hz, 1H), 3.64 (t,  $J$  = 9.2 Hz, 1H), 3.55 (dd,  $J$  = 13.8, 2.3 Hz, 1H), 3.47 – 3.30 (m, 2H), 3.15 (dd,  $J$  = 13.6, 11.2 Hz, 1H), 3.05 – 2.91 (m, 1H), 2.85-2.76 (m, 1H), 2.52 (s, 3H), 2.14 – 1.94 (m, 1H). The minor isomer:  $^1H$  NMR (400 MHz,  $CDCl_3$ )  $\delta$  7.84 (d,  $J$  = 8.2 Hz, 2H), 7.70 (dd,  $J$  = 7.9, 1.6 Hz, 1H), 7.48 – 7.40 (m, 2H), 7.34 (d,  $J$  = 8.1 Hz, 1H), 6.85 (t,  $J$  = 7.6 Hz, 1H), 6.62 (d,  $J$  = 8.4 Hz, 1H), 6.02 – 5.81 (m, 1H), 5.35 – 5.19 (m, 2H), 5.11 (d,  $J$  = 10.2 Hz, 1H), 3.72 (dd,  $J$  = 16.8, 5.1 Hz, 1H), 3.64 (t,  $J$  = 9.2 Hz, 1H), 3.55 (dd,  $J$  = 13.8, 2.3 Hz, 1H), 3.47 – 3.30 (m, 1H), 3.05 – 2.91 (m, 1H), 2.82 (dt,  $J$  = 13.4, 6.8 Hz, 1H), 2.52 (s, 3H), 2.41 – 2.35 (m, 1H), 2.14 – 1.94 (m, 2H).  $^{13}C$  NMR (100 MHz, DMSO)  $\delta$  145.2, 141.2, 136.7, 134.6, 134.5, 130.5, 128.3, 125.8, 117.9, 117.3, 116.6, 113.7, 79.7, 77.8, 58.0, 56.6, 46.0, 45.3, 35.9, 27.5, 23.5, 21.6, 19.7, 14.0. HRMS (ESI)  $m/z$ :  $[M + H]^+$  Calcd for  $C_{21}H_{25}N_2O_4S_2$  433.1250; Found 433.1259.

## VI. Control Experiments

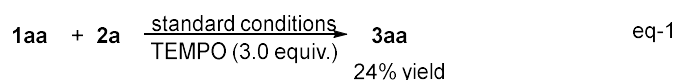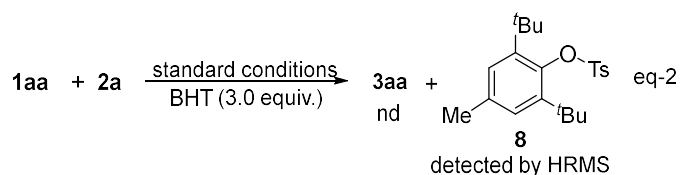

### Characterization of BHT-1a-CF<sub>3</sub> additive compound **8** by mass spectrometry

Reaction mixture was analyzed on a LC/MS (Agilent 1290 Infinity LC System connected to the Bruker micrOTOF-QII MS instrument). The high resolution mass spectrometry was performed to confirm the elemental compositions of additive compound **8**: HRMS (ESI)  $m/z$ :  $[M + Na]^+$  For  $C_{22}H_{30}NaO_3S$ , 397.1813, Found: 397.1806.

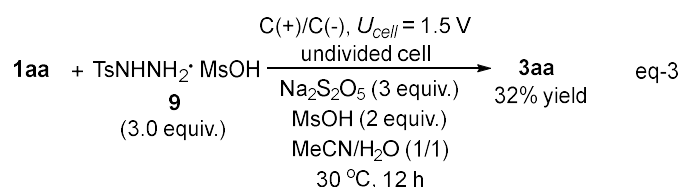

Preparation of compound **9**: to a solution of a solution of **2a** (1.0 mmol) in dry ether (4 mL), was added methanesulfonic acid (1.1 equiv.) at 0 °C. The mixture was stirred at rt for 2 h. Upon completion, the solution was filtered and the residue was washed with ether to afford a white solid **9** (260 mg, 92%). <sup>1</sup>H NMR (400 MHz, D<sub>2</sub>O)  $\delta$  7.72 (d,  $J = 8.2$  Hz, 2H), 7.41 (d,  $J = 8.0$  Hz, 2H), 2.71 (s, 3H), 2.35 (s, 3H). <sup>13</sup>C NMR (100 MHz, D<sub>2</sub>O)  $\delta$  146.4, 131.6, 130.3, 127.9, 38.4, 20.8. HRMS (ESI)  $m/z$ :  $[M - (\text{CH}_3\text{SO}_3)]^+$  Calcd for  $C_7H_{11}N_2O_2S^+$  187.0536; Found 187.0530.

Procedure of eq-3: in an undivided flask (20 mL) equipped with a stir bar, a mixture of *N*-aryl cyanamide **1aa** (0.3 mmol), **9** (0.9 mmol), Na<sub>2</sub>S<sub>2</sub>O<sub>5</sub> (0.9 mmol), MeSO<sub>3</sub>H (1.5 mmol) and MeCN/H<sub>2</sub>O (v/v = 1/1, 10 mL) were added. The cell was equipped with graphite rod anode ( $\Phi$  6 mm) and graphite plate cathode (1.5×1.5×0.2 cm), then connected to a DC regulated power supply. The reaction mixture was stirred and electrolyzed at a constant voltage of 1.5 V at 30 °C for 12 h. When the reaction was finished, the mixture was extracted with EtOAc (10 mL× 3). The combined organic layer was washed with brine, dried over Na<sub>2</sub>SO<sub>4</sub>, filtered, and concentrated *in vacuo*. The residue was purified by column chromatography (silica gel, EtOAc/Petroleum ether) to provide the desired products **3aa** in 32% yield.

## VII. Cyclic Voltammetry (CV) Experiments

Cyclic voltammetry experiments were carried out in DY2113 potentiostat (Digi Ivy). Working electrode: glassy carbon, counter electrode: Pt wire, reference electrode: SCE.

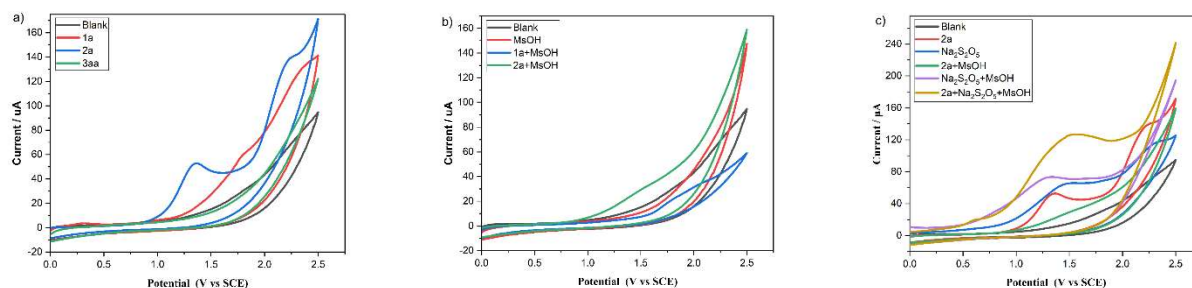

**Figure S1.** CV analysis. (a) blank (black line):  $\text{Bu}_4\text{NPF}_6$  (0.1 M) in acetonitrile and  $\text{H}_2\text{O}$  (1/1); **1a** (red line):  $E_{\text{ox}} = 1.77$  V; **2a** (blue line):  $E_{\text{ox}} = 1.36$  V; **3aa** (green line). (b) blank (black line):  $\text{Bu}_4\text{NPF}_6$  (0.1 M) in acetonitrile and  $\text{H}_2\text{O}$  (1/1); MsOH (red line); **1a** and MsOH (blue line):  $E_{\text{ox}} = 1.77$  V; **2a** and MsOH (green line). (c) blank (black line):  $\text{Bu}_4\text{NPF}_6$  (0.1 M) in acetonitrile and  $\text{H}_2\text{O}$  (1/1); **2a** (red line):  $E_{\text{ox}} = 1.36$  V;  $\text{Na}_2\text{S}_2\text{O}_5$  (blue line):  $E_{\text{ox}} = 1.46$  V; **2a** and MsOH (green line);  $\text{Na}_2\text{S}_2\text{O}_5$  and MsOH (purple line):  $E_{\text{ox}} = 1.31$  V; **2a**,  $\text{Na}_2\text{S}_2\text{O}_5$  and MsOH (orange line):  $E_{\text{ox}} = 1.48$  V. Scan rate: 50 mV/s.

## VIII. References

1. Z. Li, L. Jiao, Y. Sun, Z. He, Z. Wei and W.-W. Liao, *Angew. Chem. Int. Ed.*, 2020, **59**, 7266-7270..
2. D. Chen, M. Ji and C. Zhu, *Chem. Commun.*, 2019, **55**, 7796-7799.
3. Z. Li, Y.-H. Wu, J.-M. Xi, Z.-L. Wei and W.-W. Liao, *Org. Lett.*, 2021, **23**, 9591-9596.
4. Z. Pan, S. Wang, J. T. Brethorst and C. J. Douglas, *J. Am. Chem. Soc.*, 2018, **140**, 3331-3338.

## IX. Crystal Data and Structure Refinement for Compounds 3a

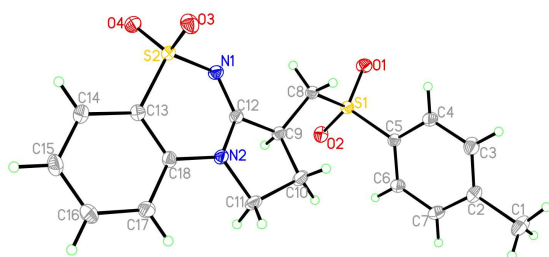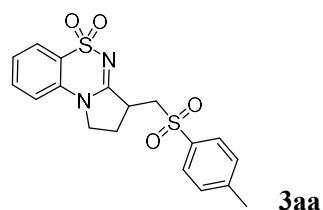

CCDC number: 2216999

X-ray crystal structure of compound **3aa**. Single crystal of **3aa** was obtained by slow evaporation of Petroleum ether/EtOAc solution. Crystal measurement of **3aa** was measured on R-Axis RAPID of Rigaku Corporation plus 291.2 k. Thermal ellipsoids are set at 30% probability.

Table S- crystal-1 Crystal data and structure refinement for **3aa**.

|                                 |                                                                              |                  |
|---------------------------------|------------------------------------------------------------------------------|------------------|
| Identification code             | 3aa                                                                          |                  |
| Empirical formula               | C <sub>18</sub> H <sub>18</sub> N <sub>2</sub> O <sub>4</sub> S <sub>2</sub> |                  |
| Formula weight                  | 390.46                                                                       |                  |
| Temperature                     | 293(2) K                                                                     |                  |
| Wavelength                      | 0.71073 Å                                                                    |                  |
| Crystal system                  | Monoclinic                                                                   |                  |
| Space group                     | P2 <sub>1</sub> /c                                                           |                  |
| Unit cell dimensions            | a = 13.181(2) Å                                                              | α = 90°.         |
|                                 | b = 8.8095(17) Å                                                             | β = 105.852(7)°. |
|                                 | c = 16.111(3) Å                                                              | γ = 90°.         |
| Volume                          | 1799.6(6) Å <sup>3</sup>                                                     |                  |
| Z                               | 4                                                                            |                  |
| Density (calculated)            | 1.441 Mg/m <sup>3</sup>                                                      |                  |
| Absorption coefficient          | 0.323 mm <sup>-1</sup>                                                       |                  |
| F(000)                          | 816                                                                          |                  |
| Crystal size                    | 0.200 x 0.190 x 0.170 mm <sup>3</sup>                                        |                  |
| Theta range for data collection | 2.628 to 27.593°.                                                            |                  |
| Index ranges                    | -17<=h<=17, -11<=k<=11, -20<=l<=20                                           |                  |

|                                   |                                             |
|-----------------------------------|---------------------------------------------|
| Reflections collected             | 60544                                       |
| Independent reflections           | 4144 [R(int) = 0.0676]                      |
| Completeness to theta = 25.242°   | 99.7 %                                      |
| Refinement method                 | Full-matrix least-squares on F <sup>2</sup> |
| Data / restraints / parameters    | 4144 / 0 / 212                              |
| Goodness-of-fit on F <sup>2</sup> | 0.657                                       |
| Final R indices [I>2sigma(I)]     | R1 = 0.0383, wR2 = 0.1103                   |
| R indices (all data)              | R1 = 0.0420, wR2 = 0.1163                   |
| Extinction coefficient            | n/a                                         |
| Largest diff. peak and hole       | 0.445 and -0.380 e.Å <sup>-3</sup>          |

Table S- crystal-2. Atomic coordinates (x 10<sup>4</sup>) and equivalent isotropic displacement parameters (Å<sup>2</sup>x 10<sup>3</sup>)

for Y. U(eq) is defined as one third of the trace of the orthogonalized U<sup>ij</sup> tensor.

|       | x        | y       | z       | U(eq) |
|-------|----------|---------|---------|-------|
| C(1)  | 11002(2) | 6961(3) | 5662(2) | 52(1) |
| C(2)  | 10321(1) | 7377(2) | 4769(1) | 35(1) |
| C(3)  | 9441(1)  | 8298(2) | 4679(1) | 38(1) |
| C(4)  | 8811(1)  | 8664(1) | 3862(1) | 32(1) |
| C(5)  | 9060(1)  | 8111(1) | 3134(1) | 24(1) |
| C(6)  | 9940(1)  | 7190(2) | 3223(1) | 34(1) |
| C(7)  | 10570(1) | 6823(2) | 4041(1) | 41(1) |
| C(8)  | 7011(1)  | 7675(2) | 2011(1) | 25(1) |
| C(9)  | 7005(1)  | 6002(2) | 1784(1) | 25(1) |
| C(10) | 7560(1)  | 4883(2) | 2489(1) | 34(1) |
| C(11) | 7028(1)  | 3375(2) | 2162(1) | 35(1) |
| C(12) | 5903(1)  | 5349(2) | 1493(1) | 23(1) |
| C(13) | 4166(1)  | 3415(1) | 834(1)  | 24(1) |

|       |         |          |         |       |
|-------|---------|----------|---------|-------|
| C(14) | 3380(1) | 2425(1)  | 397(1)  | 29(1) |
| C(15) | 3554(1) | 868(1)   | 450(1)  | 36(1) |
| C(16) | 4515(1) | 300(1)   | 941(1)  | 41(1) |
| C(17) | 5302(1) | 1290(1)  | 1378(1) | 36(1) |
| C(18) | 5128(1) | 2847(1)  | 1324(1) | 25(1) |
| N(1)  | 5095(1) | 6129(2)  | 1057(1) | 27(1) |
| N(2)  | 5943(1) | 3864(2)  | 1712(1) | 25(1) |
| O(1)  | 8038(1) | 10194(2) | 2101(1) | 34(1) |
| O(2)  | 8698(1) | 7964(2)  | 1459(1) | 33(1) |
| O(3)  | 3476(1) | 5682(2)  | 1538(1) | 38(1) |
| O(4)  | 3340(1) | 5859(2)  | -3(1)   | 37(1) |
| S(1)  | 8248(1) | 8583(1)  | 2110(1) | 24(1) |
| S(2)  | 3935(1) | 5368(1)  | 842(1)  | 24(1) |

---

Table S- crystal-3 Bond lengths [ $\text{\AA}$ ] and angles [ $^\circ$ ] for Y.

|             |            |
|-------------|------------|
| C(1)-C(2)   | 1.518(2)   |
| C(2)-C(3)   | 1.3900     |
| C(2)-C(7)   | 1.3900     |
| C(3)-C(4)   | 1.3900     |
| C(4)-C(5)   | 1.3900     |
| C(5)-C(6)   | 1.3900     |
| C(5)-S(1)   | 1.7530     |
| C(6)-C(7)   | 1.3900     |
| C(8)-C(9)   | 1.518(2)   |
| C(8)-S(1)   | 1.7839(16) |
| C(9)-C(12)  | 1.512(2)   |
| C(9)-C(10)  | 1.530(2)   |
| C(10)-C(11) | 1.528(3)   |

|                  |            |
|------------------|------------|
| C(11)-N(2)       | 1.479(2)   |
| C(12)-N(1)       | 1.301(2)   |
| C(12)-N(2)       | 1.352(2)   |
| C(13)-C(14)      | 1.3900     |
| C(13)-C(18)      | 1.3900     |
| C(13)-S(2)       | 1.7477     |
| C(14)-C(15)      | 1.3900     |
| C(15)-C(16)      | 1.3900     |
| C(16)-C(17)      | 1.3900     |
| C(17)-C(18)      | 1.3900     |
| C(18)-N(2)       | 1.4076(16) |
| N(1)-S(2)        | 1.6182(15) |
| O(1)-S(1)        | 1.4452(14) |
| O(2)-S(1)        | 1.4454(13) |
| O(3)-S(2)        | 1.4385(14) |
| O(4)-S(2)        | 1.4398(14) |
|                  |            |
| C(3)-C(2)-C(7)   | 120.0      |
| C(3)-C(2)-C(1)   | 119.98(13) |
| C(7)-C(2)-C(1)   | 120.01(13) |
| C(4)-C(3)-C(2)   | 120.0      |
| C(3)-C(4)-C(5)   | 120.0      |
| C(6)-C(5)-C(4)   | 120.0      |
| C(6)-C(5)-S(1)   | 120.94(6)  |
| C(4)-C(5)-S(1)   | 119.05(6)  |
| C(5)-C(6)-C(7)   | 120.0      |
| C(6)-C(7)-C(2)   | 120.0      |
| C(9)-C(8)-S(1)   | 113.68(12) |
| C(12)-C(9)-C(8)  | 112.70(14) |
| C(12)-C(9)-C(10) | 102.06(13) |



|                   |            |
|-------------------|------------|
| C(8)-C(9)-C(10)   | 118.48(15) |
| C(11)-C(10)-C(9)  | 102.89(14) |
| N(2)-C(11)-C(10)  | 101.93(14) |
| N(1)-C(12)-N(2)   | 128.31(15) |
| N(1)-C(12)-C(9)   | 122.78(15) |
| N(2)-C(12)-C(9)   | 108.78(14) |
| C(14)-C(13)-C(18) | 120.0      |
| C(14)-C(13)-S(2)  | 120.91(6)  |
| C(18)-C(13)-S(2)  | 118.93(6)  |
| C(13)-C(14)-C(15) | 120.0      |
| C(16)-C(15)-C(14) | 120.0      |
| C(17)-C(16)-C(15) | 120.0      |
| C(16)-C(17)-C(18) | 120.0      |
| C(17)-C(18)-C(13) | 120.0      |
| C(17)-C(18)-N(2)  | 120.50(9)  |
| C(13)-C(18)-N(2)  | 119.34(9)  |
| C(12)-N(1)-S(2)   | 118.88(12) |
| C(12)-N(2)-C(18)  | 121.96(13) |
| C(12)-N(2)-C(11)  | 111.88(14) |
| C(18)-N(2)-C(11)  | 123.40(13) |
| O(1)-S(1)-O(2)    | 118.62(9)  |
| O(1)-S(1)-C(5)    | 107.98(7)  |
| O(2)-S(1)-C(5)    | 109.04(7)  |
| O(1)-S(1)-C(8)    | 105.78(8)  |
| O(2)-S(1)-C(8)    | 108.17(8)  |
| C(5)-S(1)-C(8)    | 106.62(7)  |
| O(3)-S(2)-O(4)    | 116.21(9)  |
| O(3)-S(2)-N(1)    | 109.11(8)  |
| O(4)-S(2)-N(1)    | 108.50(8)  |
| O(3)-S(2)-C(13)   | 107.88(8)  |

O(4)-S(2)-C(13) 109.86(7)

N(1)-S(2)-C(13) 104.67(7)

---

Symmetry transformations used to generate equivalent atoms:

Table S- crystal-4 Anisotropic displacement parameters ( $\text{\AA}^2 \times 10^3$ ) for Y. The anisotropic

displacement factor exponent takes the form:  $-2\pi^2 [h^2 a^{*2} U^{11} + \dots + 2 h k a^* b^* U^{12}]$

---

|       | U <sup>11</sup> | U <sup>22</sup> | U <sup>33</sup> | U <sup>23</sup> | U <sup>13</sup> | U <sup>12</sup> |
|-------|-----------------|-----------------|-----------------|-----------------|-----------------|-----------------|
| C(1)  | 42(1)           | 69(2)           | 37(1)           | 10(1)           | -3(1)           | 7(1)            |
| C(2)  | 27(1)           | 41(1)           | 32(1)           | 3(1)            | 1(1)            | 0(1)            |
| C(3)  | 31(1)           | 51(1)           | 31(1)           | -4(1)           | 9(1)            | 1(1)            |
| C(4)  | 24(1)           | 40(1)           | 32(1)           | -3(1)           | 7(1)            | 6(1)            |
| C(5)  | 20(1)           | 24(1)           | 27(1)           | -1(1)           | 4(1)            | -1(1)           |
| C(6)  | 29(1)           | 38(1)           | 34(1)           | -5(1)           | 7(1)            | 9(1)            |
| C(7)  | 30(1)           | 45(1)           | 43(1)           | -1(1)           | 2(1)            | 14(1)           |
| C(8)  | 20(1)           | 22(1)           | 31(1)           | -1(1)           | 4(1)            | -1(1)           |
| C(9)  | 23(1)           | 23(1)           | 28(1)           | 3(1)            | 4(1)            | 0(1)            |
| C(10) | 27(1)           | 28(1)           | 37(1)           | 7(1)            | -5(1)           | -1(1)           |
| C(11) | 28(1)           | 24(1)           | 44(1)           | 11(1)           | -6(1)           | 1(1)            |
| C(12) | 23(1)           | 21(1)           | 24(1)           | 2(1)            | 5(1)            | -1(1)           |
| C(13) | 27(1)           | 24(1)           | 22(1)           | 2(1)            | 7(1)            | -2(1)           |
| C(14) | 26(1)           | 33(1)           | 28(1)           | 0(1)            | 5(1)            | -5(1)           |
| C(15) | 38(1)           | 31(1)           | 38(1)           | -3(1)           | 6(1)            | -12(1)          |
| C(16) | 45(1)           | 23(1)           | 50(1)           | 1(1)            | 6(1)            | -6(1)           |
| C(17) | 35(1)           | 23(1)           | 43(1)           | 5(1)            | 0(1)            | -2(1)           |
| C(18) | 28(1)           | 22(1)           | 24(1)           | 2(1)            | 4(1)            | -4(1)           |
| N(1)  | 23(1)           | 23(1)           | 33(1)           | 3(1)            | 4(1)            | 0(1)            |

|      |       |       |       |        |       |       |
|------|-------|-------|-------|--------|-------|-------|
| N(2) | 25(1) | 20(1) | 26(1) | 5(1)   | 1(1)  | -1(1) |
| O(1) | 34(1) | 21(1) | 45(1) | 5(1)   | 6(1)  | -2(1) |
| O(2) | 31(1) | 42(1) | 30(1) | -2(1)  | 12(1) | -4(1) |
| O(3) | 35(1) | 42(1) | 40(1) | -12(1) | 18(1) | -4(1) |
| O(4) | 37(1) | 32(1) | 33(1) | 1(1)   | -3(1) | 6(1)  |
| S(1) | 22(1) | 22(1) | 27(1) | 2(1)   | 6(1)  | -2(1) |
| S(2) | 20(1) | 25(1) | 26(1) | -2(1)  | 4(1)  | 1(1)  |

Table S- crystal-5. Hydrogen coordinates ( $\times 10^4$ ) and isotropic displacement parameters ( $\text{\AA}^2 \times 10^3$ )

for Y.

|        | x     | y    | z    | U(eq) |
|--------|-------|------|------|-------|
| H(1A)  | 10727 | 7439 | 6090 | 78    |
| H(1B)  | 11711 | 7301 | 5726 | 78    |
| H(1C)  | 10998 | 5880 | 5734 | 78    |
| H(3)   | 9274  | 8668 | 5166 | 45    |
| H(4)   | 8222  | 9280 | 3802 | 39    |
| H(6)   | 10107 | 6820 | 2736 | 41    |
| H(7)   | 11159 | 6208 | 4101 | 49    |
| H(8A)  | 6827  | 7780 | 2552 | 30    |
| H(8B)  | 6473  | 8190 | 1569 | 30    |
| H(9)   | 7325  | 5900 | 1305 | 30    |
| H(10A) | 8311  | 4843 | 2545 | 40    |
| H(10B) | 7450  | 5154 | 3042 | 40    |
| H(11A) | 7365  | 2883 | 1768 | 42    |
| H(11B) | 7034  | 2691 | 2635 | 42    |

|       |      |      |      |    |
|-------|------|------|------|----|
| H(14) | 2737 | 2805 | 69   | 35 |
| H(15) | 3028 | 206  | 158  | 44 |
| H(16) | 4632 | -742 | 976  | 49 |
| H(17) | 5945 | 910  | 1706 | 43 |

---
